# Supplementary material for: Synthesis of novel fatty acid 3,4-dihydropyrimidin-2-(1H)-one and antitumoral activity against breast and gastric cancer cells
Source: Royal Society of Chemistry journal article supplement (doi:10.1039/d4ra03292f), 2024-01-01
Supplement: d4ra03292f1.pdf [file d4ra03292f1.pdf]

## Supporting Information

### Synthesis of novel fatty acid 3,4-Dihydropyrimidin-2-(1H)-one and antitumoral activity against breast and gastric cancer cells

E. A. M. Rios,<sup>a</sup> C. M. Dea,<sup>a</sup> E. R. F. B. dos Santos,<sup>a</sup> M. G. M. D'Oca,<sup>b</sup> D. S. Rampon,<sup>a</sup>  
F. M. Nachtigall,<sup>c</sup> L. S. Santos,<sup>d</sup> L. Guzman,<sup>e</sup> R. Moore,<sup>e</sup> D. Rebolledo,<sup>f</sup> and C. R. M.  
D'Oca.\*<sup>a</sup>

<sup>a</sup> Laboratory of Polymers and Catalysis (LAPOCA), Department of Chemistry, Federal University of Parana' – UFPR, P. O. Box 19061, Curitiba, PR, 81531-990, Brazil. E-mail: carolinedoca@ufpr.br.

<sup>b</sup> Kolbe's Laboratory of Organic Synthesis, Department of Chemistry, Federal University of Parana' – UFPR, P. O. Box 19032, Curitiba, PR, 81531-990, Brazil.

<sup>c</sup> Instituto de Ciencias Aplicadas – Universidad Autónoma de Chile, Talca 3467987, Chile.

<sup>d</sup> Laboratory of Asymmetric Synthesis, Chemistry Institute of Natural Resources, Universidad de Talca, Talca 3460000, Chile.

<sup>e</sup> Departamento de Bioquímica Clínica e Inmunohematología, Facultad de Ciencias de la Salud, Universidad de Talca, P.O. Box 747, Talca 3460000, Chile.

<sup>f</sup> Center for Medical Research, School of Medicine, University of Talca, Talca 3460000, Chile.

## Contents

|                                                                            |         |
|----------------------------------------------------------------------------|---------|
| 1. Selected <sup>1</sup> H, <sup>13</sup> C NMR and Infrared spectra ..... | S01-S60 |
|----------------------------------------------------------------------------|---------|

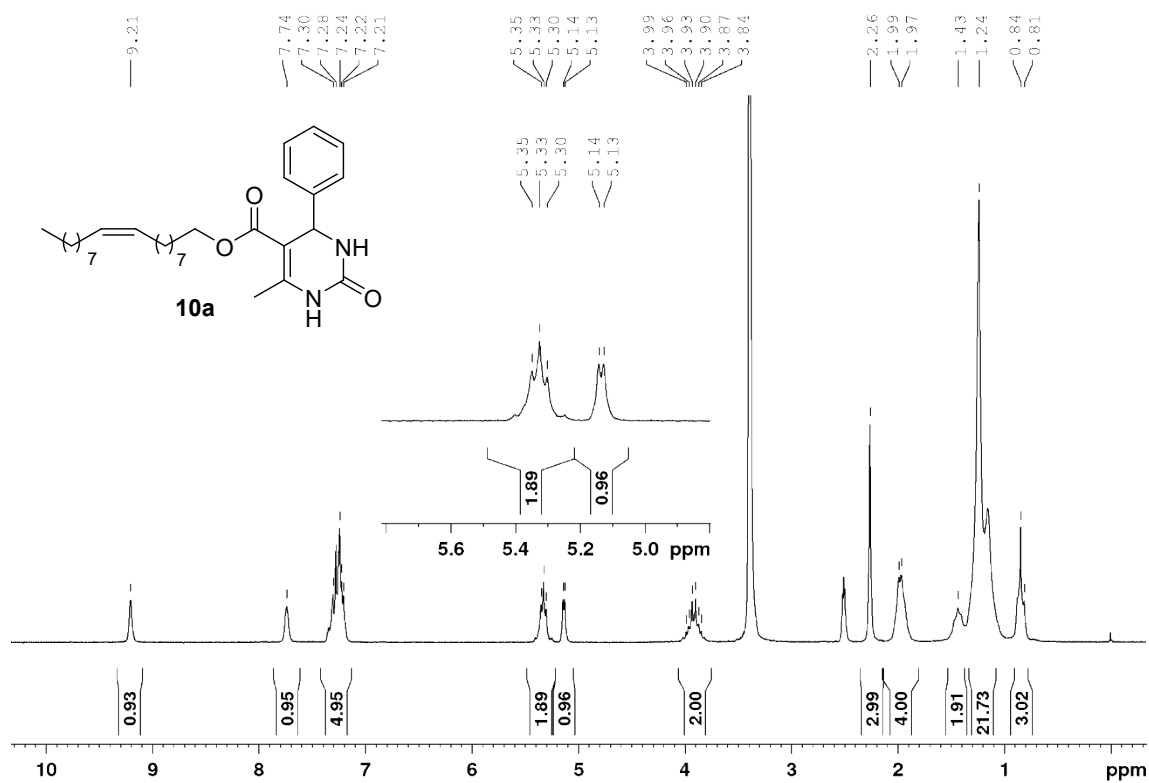

**Figure S1.**  $^1\text{H}$  NMR (400 MHz,  $\text{DMSO-d}_6$ ) spectrum of **10a**

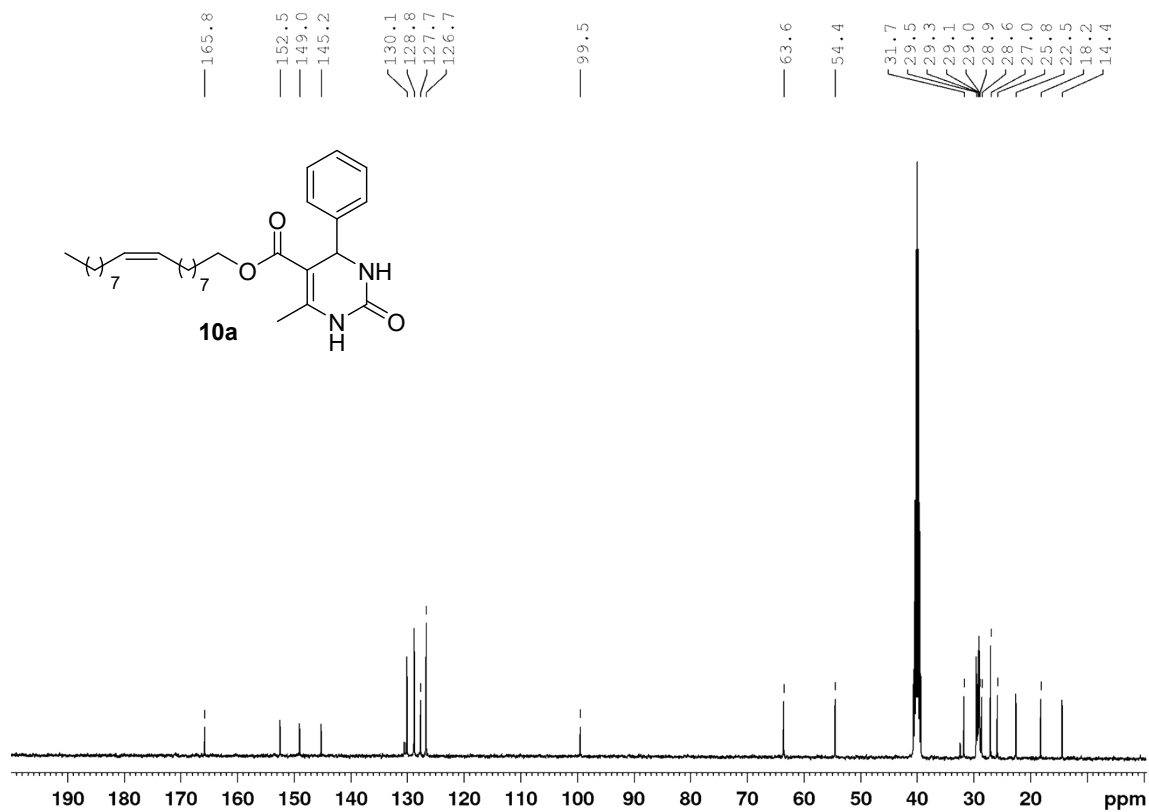

**Figure S2.**  $^{13}\text{C}$  NMR (100 MHz,  $\text{DMSO-d}_6$ ) spectrum of **10a**

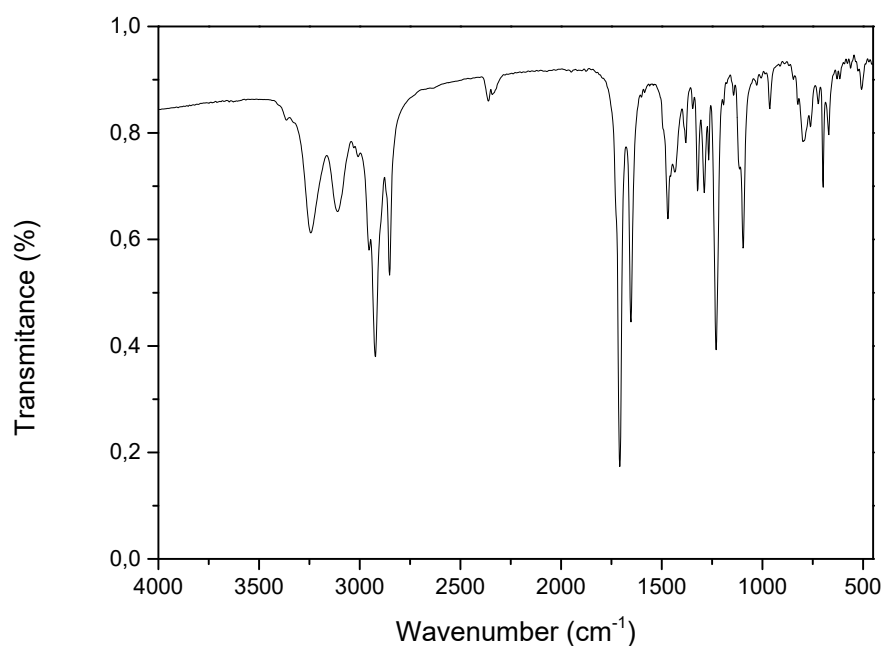

**Figure S3.** FT-IR (4000-400  $\text{cm}^{-1}$ , KBr) spectrum of **10a**

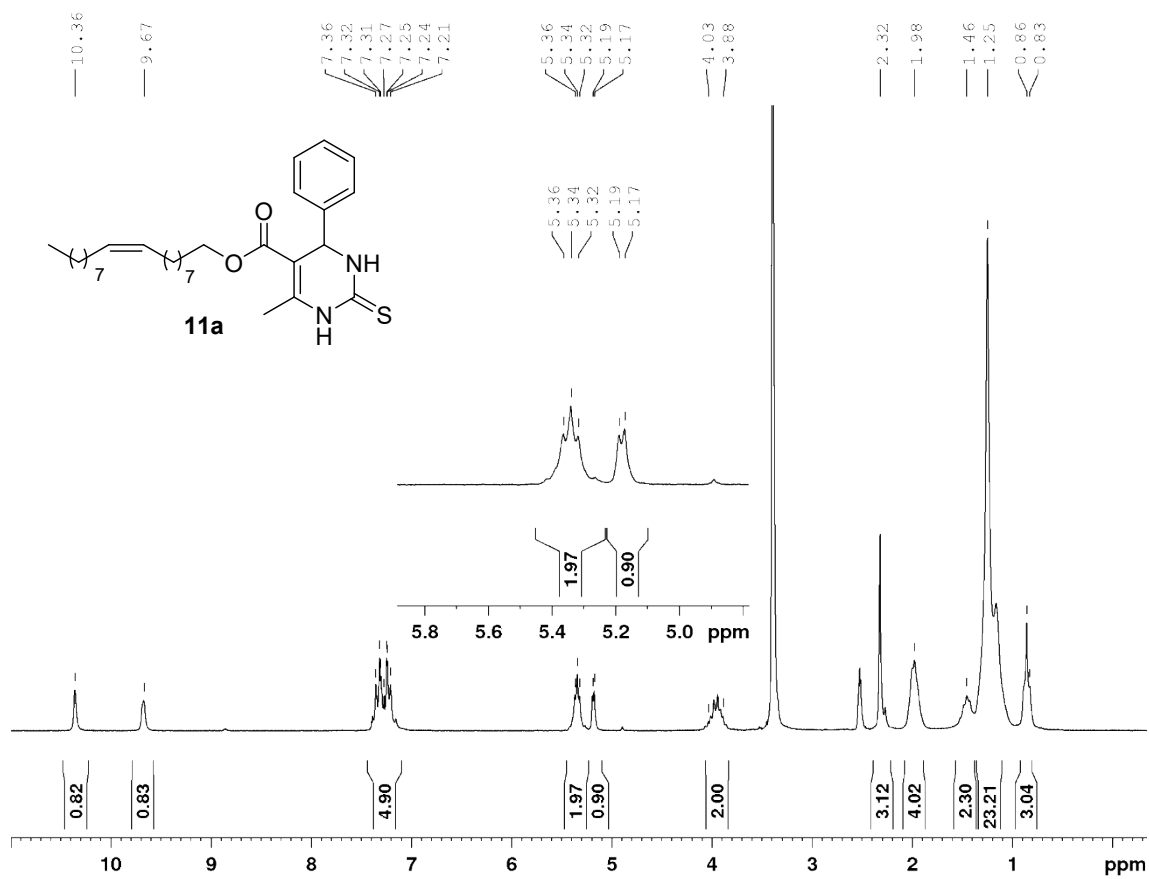

**Figure S4.**  $^1\text{H}$  NMR (400 MHz,  $\text{DMSO-d}_6$ ) spectrum of **11a**

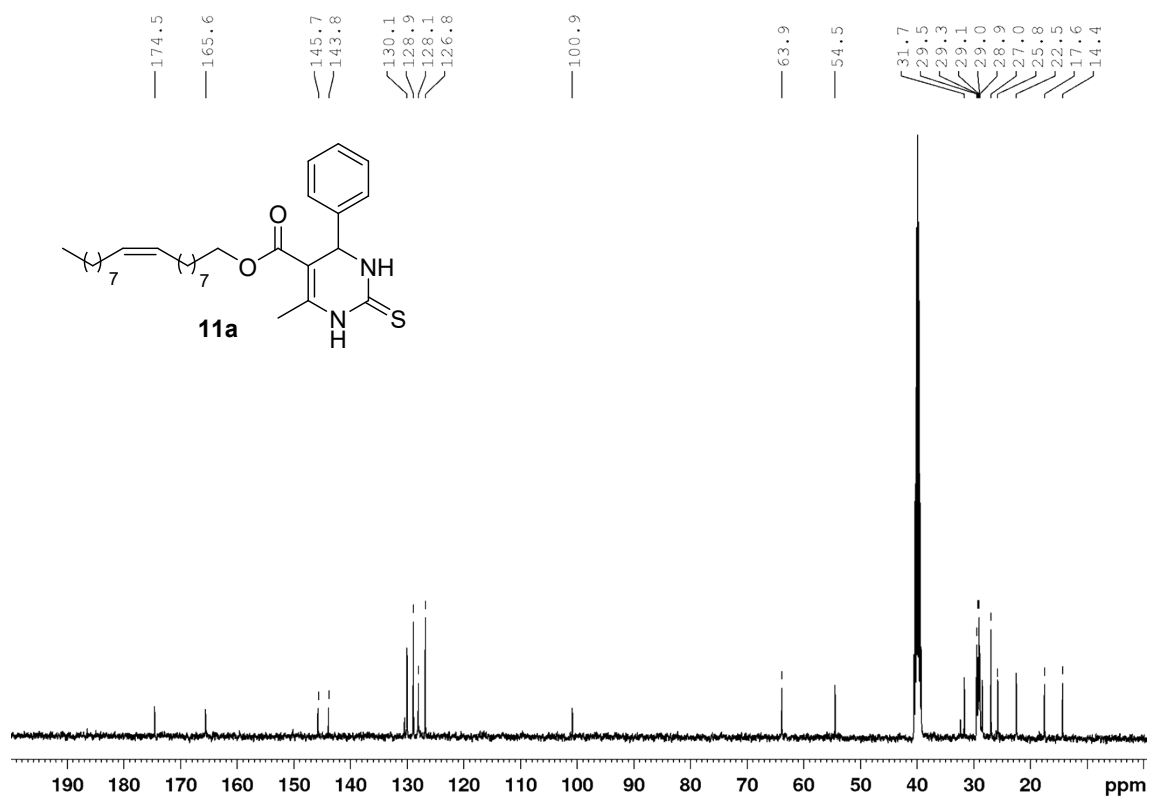

**Figure S5.**  $^{13}\text{C}$  NMR (100 MHz,  $\text{DMSO-d}_6$ ) spectrum of **11a**

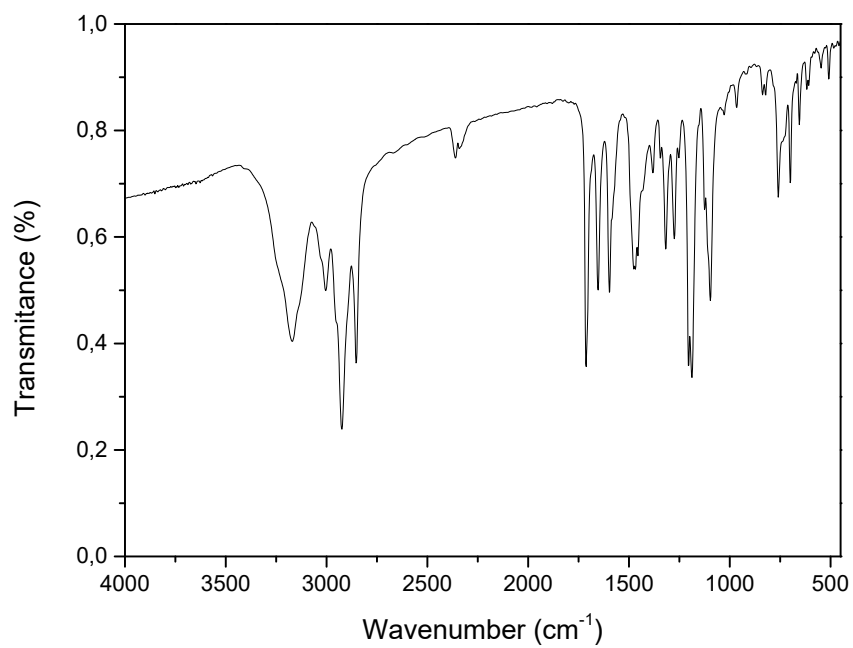

**Figure S6.** FT-IR (4000-400  $\text{cm}^{-1}$ , KBr) spectrum of **11a**

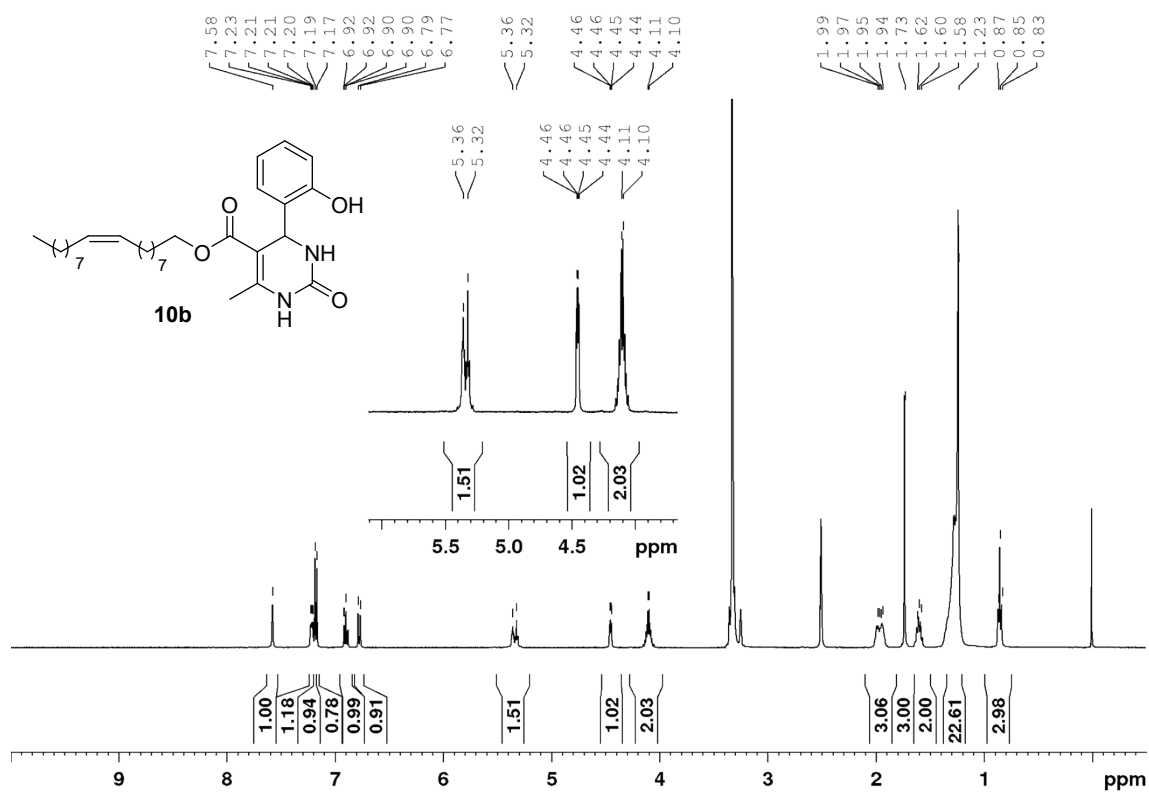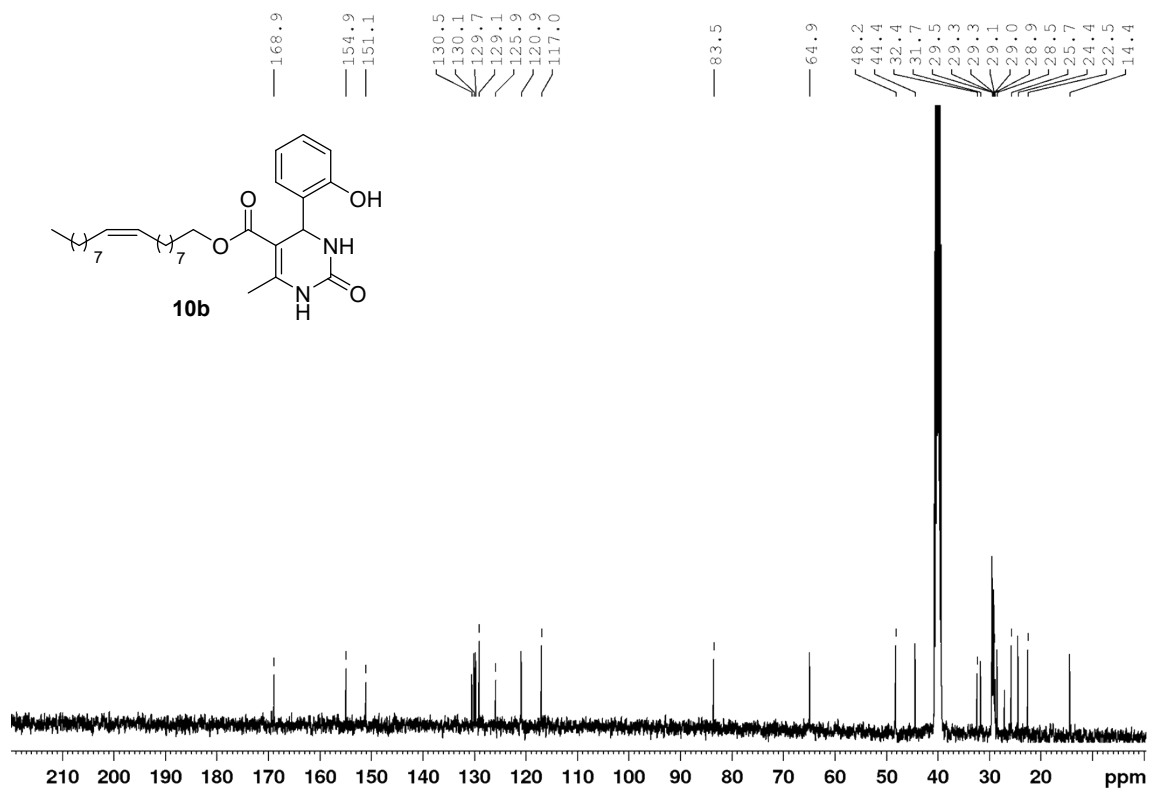

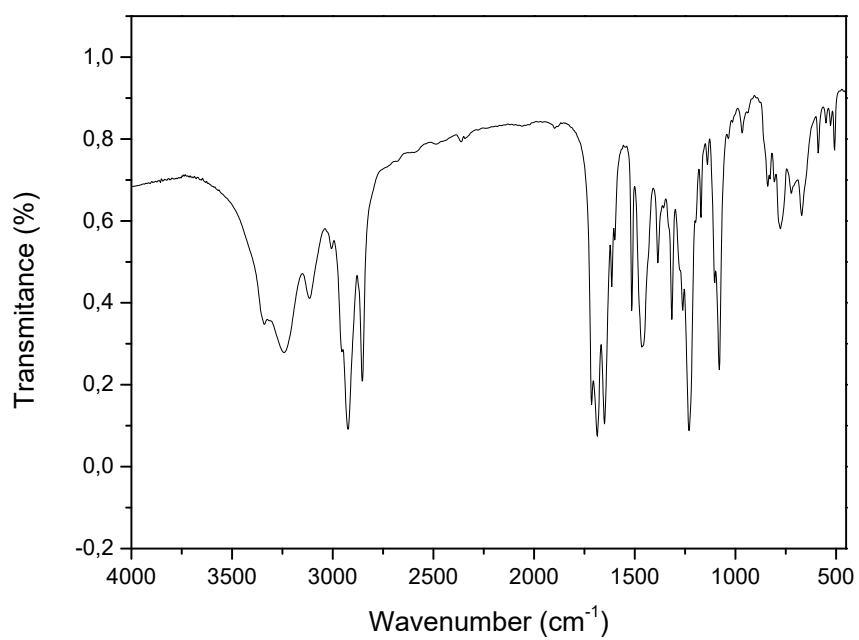

**Figure S9.** FT-IR (4000-400  $\text{cm}^{-1}$ , KBr) spectrum of **10b**

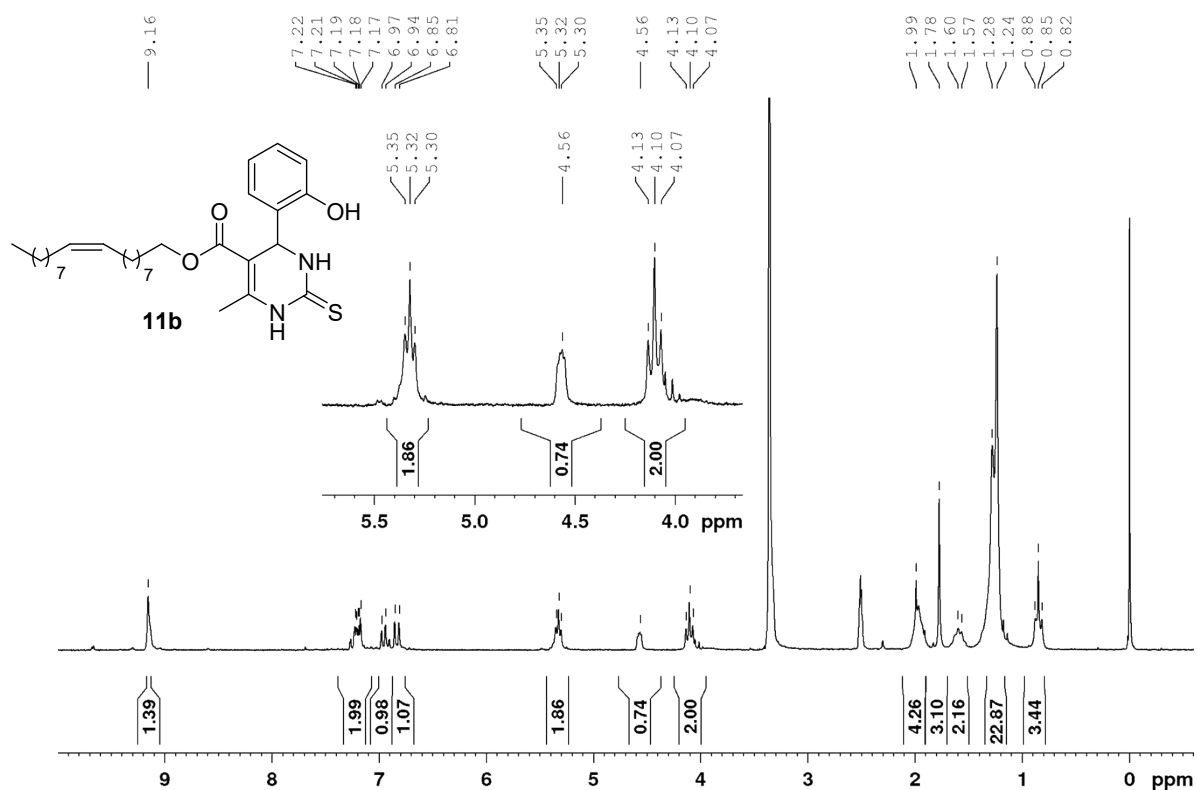

**Figure S10.**  $^1\text{H}$  NMR (400 MHz,  $\text{DMSO-d}_6$ ) spectrum of **11b**

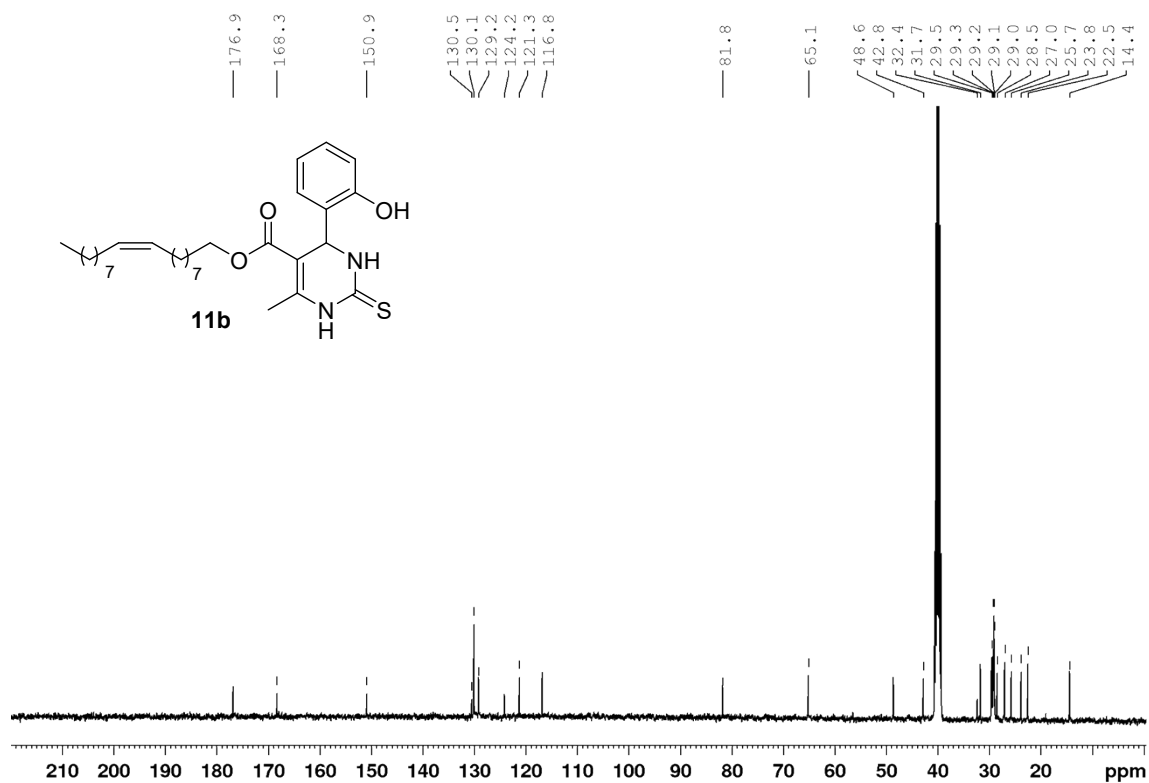

**Figure S11.**  $^{13}\text{C}$  NMR (100 MHz,  $\text{DMSO-d}_6$ ) spectrum of **11b**

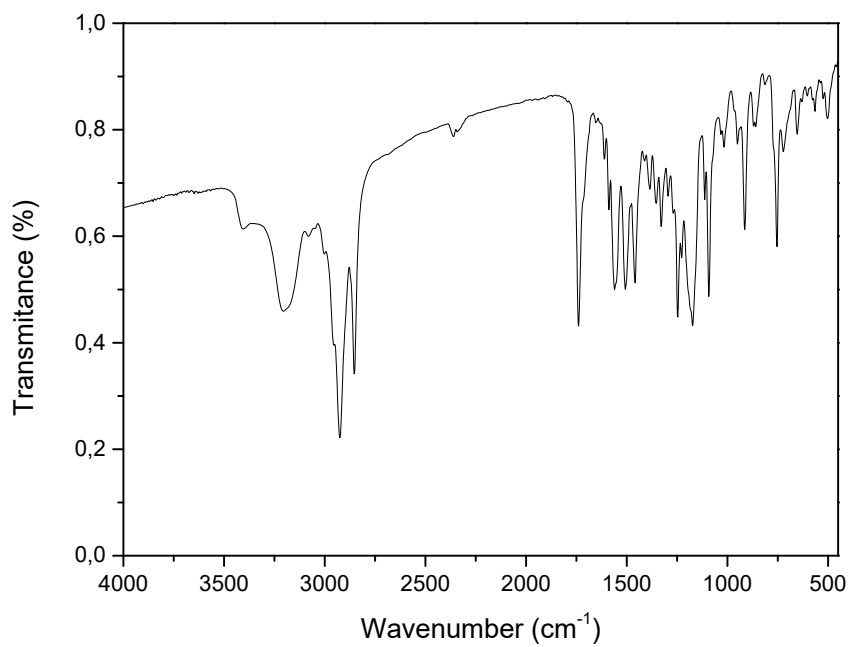

**Figure S12.** FT-IR (4000-400  $\text{cm}^{-1}$ , KBr) spectrum of **11b**

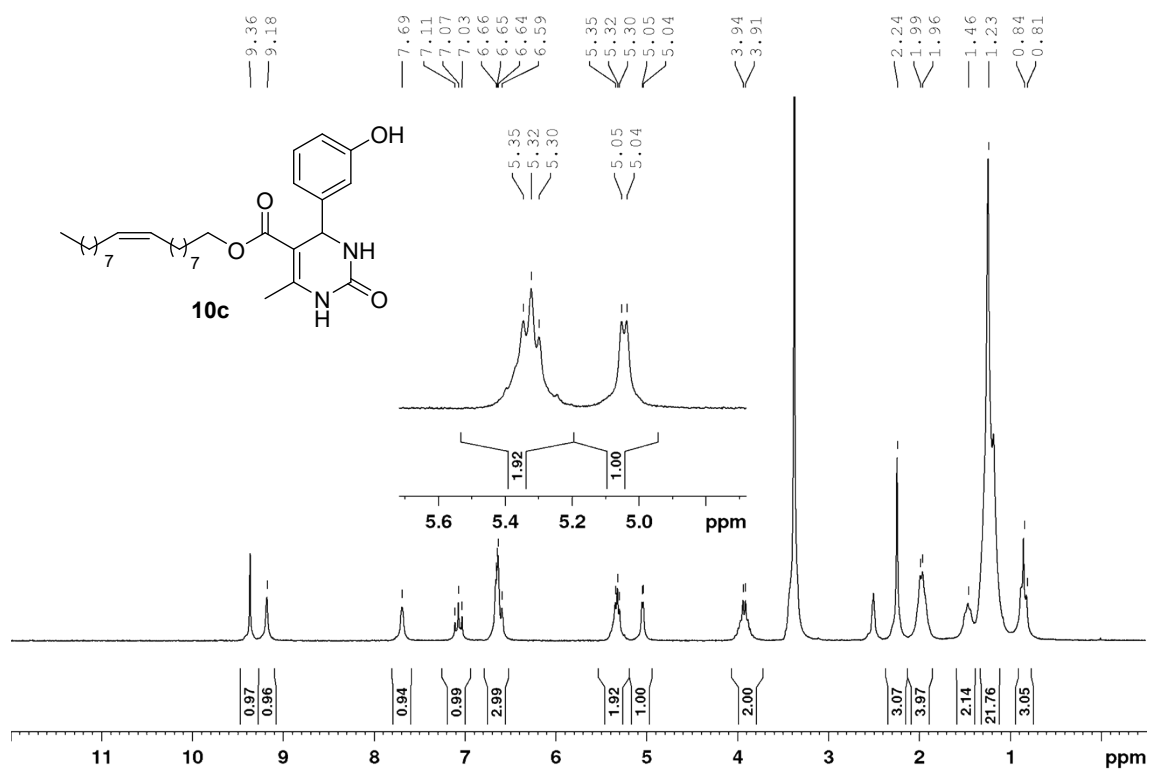

**Figure S13.**  $^1\text{H}$  NMR (400 MHz,  $\text{DMSO-d}_6$ ) spectrum of **10c**

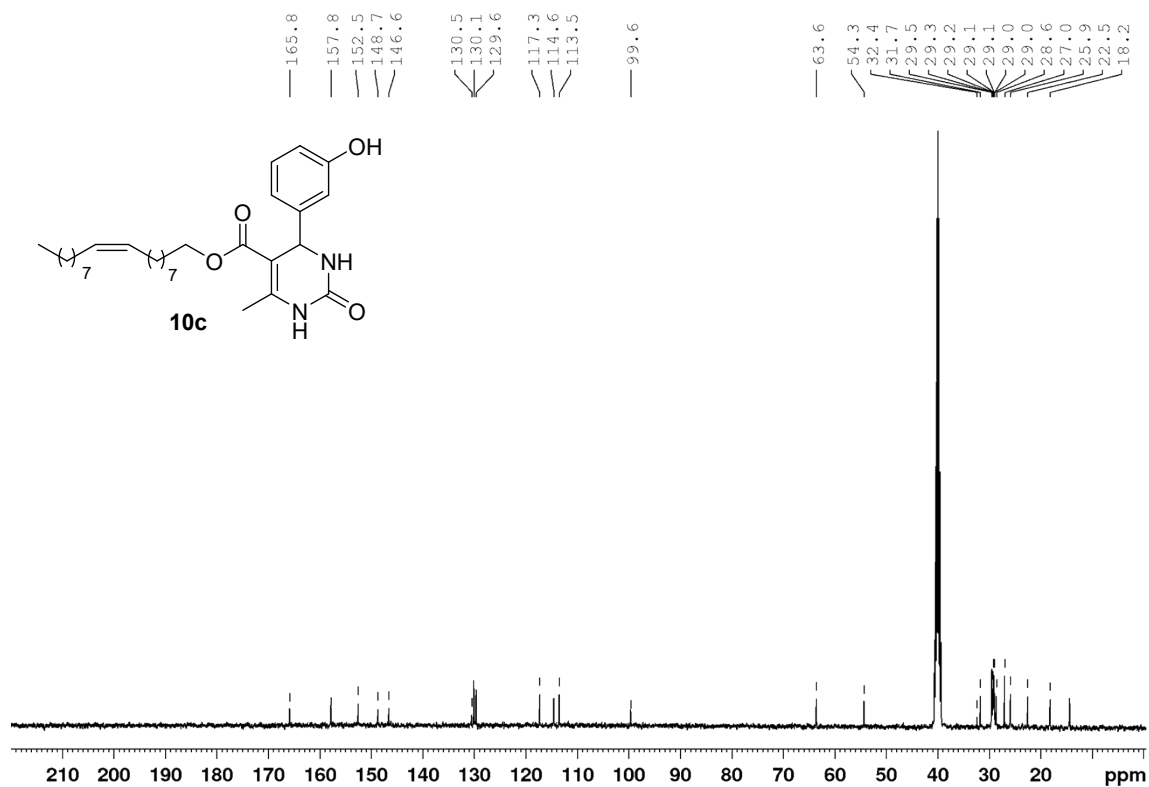

**Figure S14.**  $^{13}\text{C}$  NMR (100 MHz,  $\text{DMSO-d}_6$ ) spectrum of **10c**



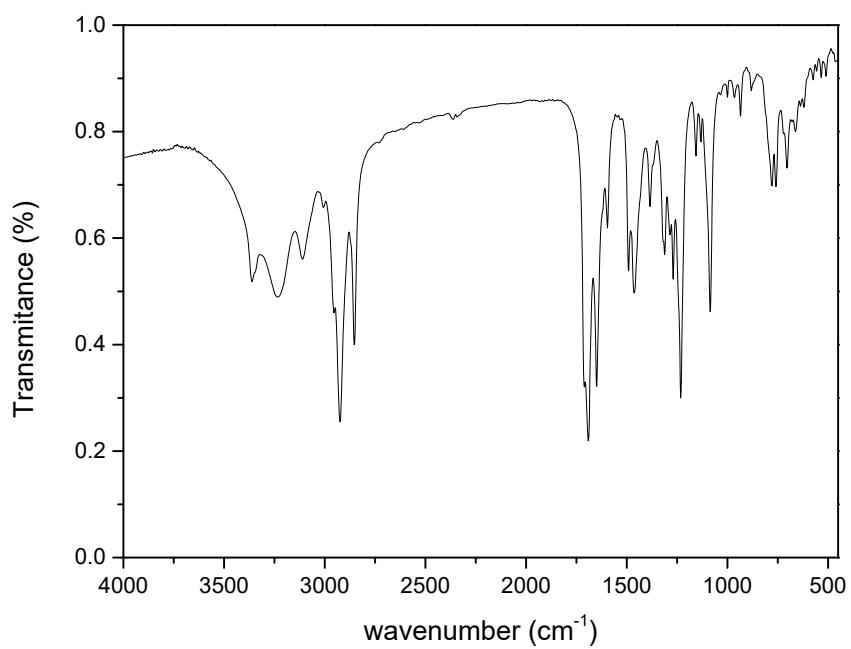

**Figure S15.** FT-IR (4000-400 cm<sup>-1</sup>, KBr) spectrum of **10c**

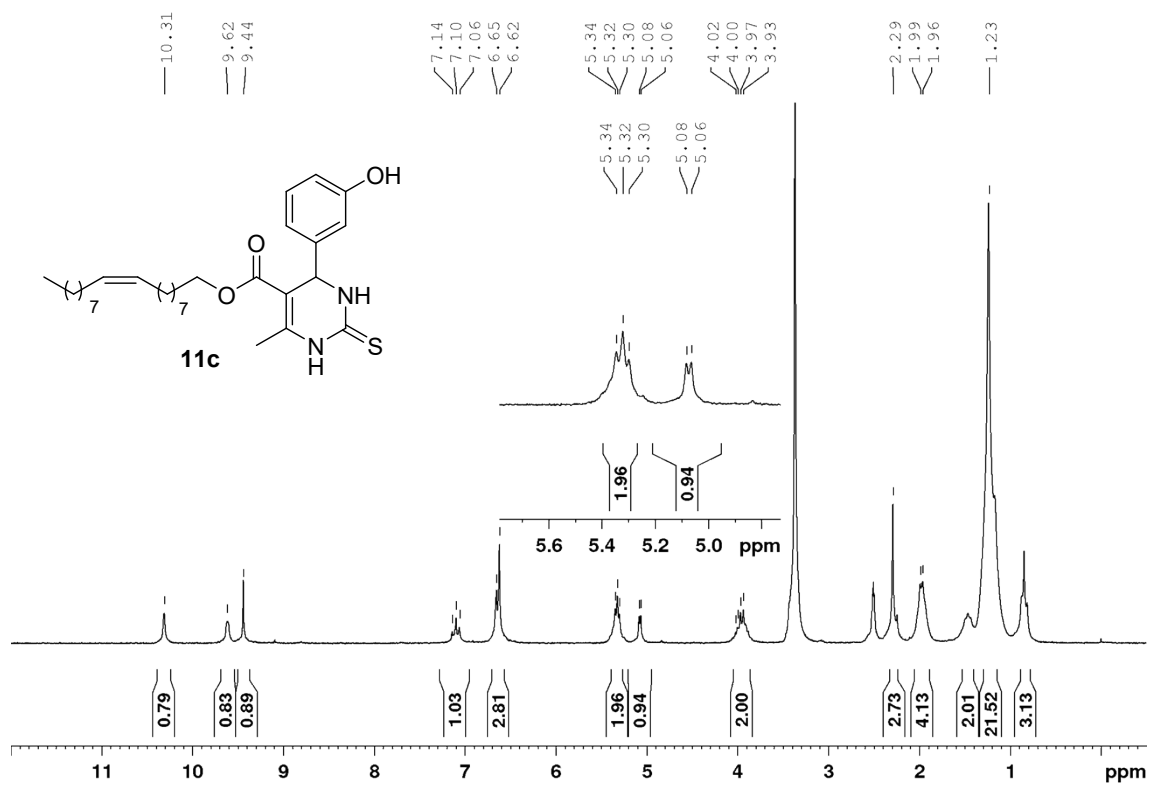

**Figure S16.** <sup>1</sup>H NMR (400 MHz, DMSO-d<sub>6</sub>) spectrum of **11c**

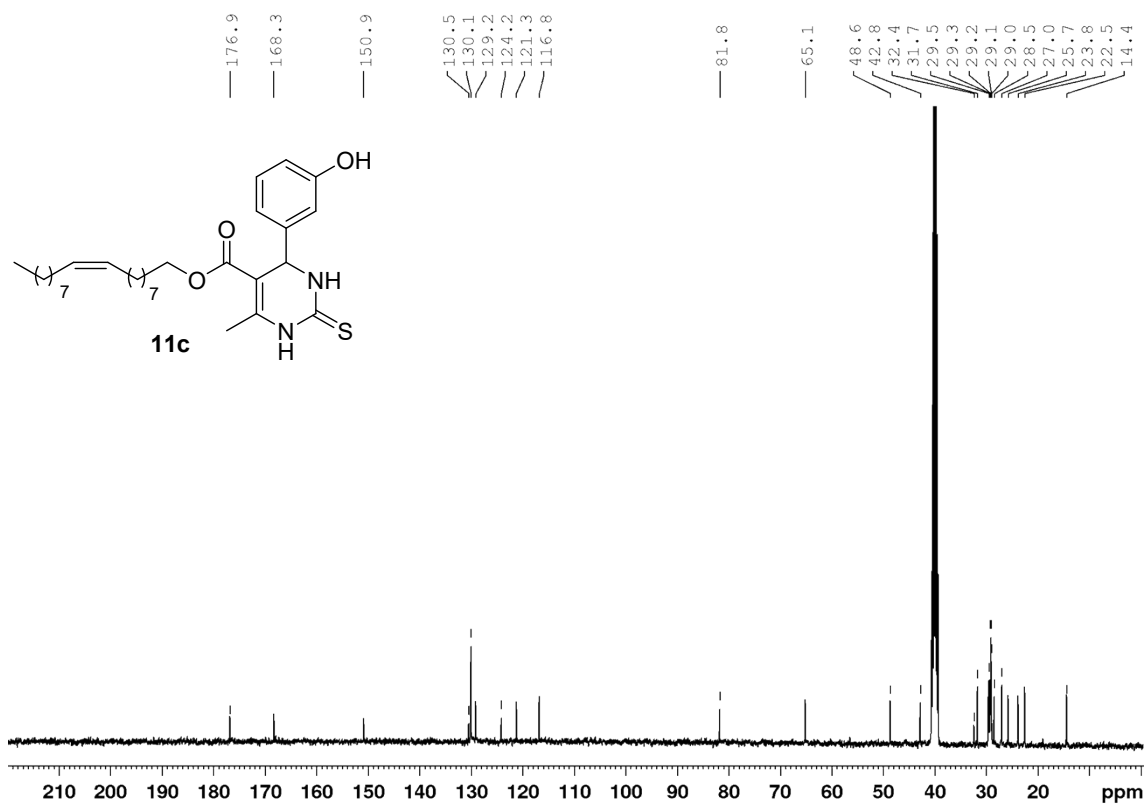

**Figure S17.**  $^{13}\text{C}$  NMR (100 MHz,  $\text{DMSO-d}_6$ ) spectrum of **11c**

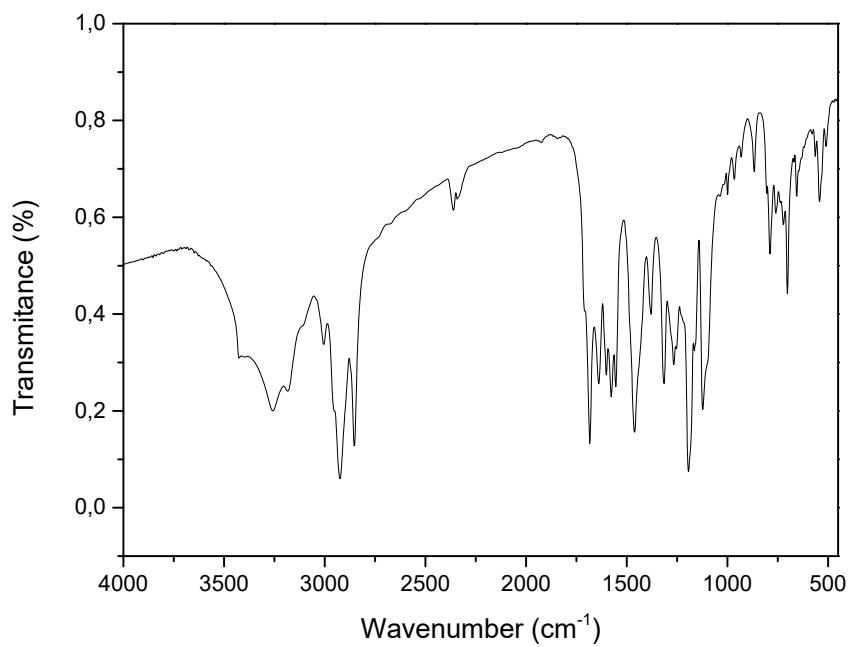

**Figure S18.** FT-IR (4000-400  $\text{cm}^{-1}$ , KBr) spectrum of **11c**

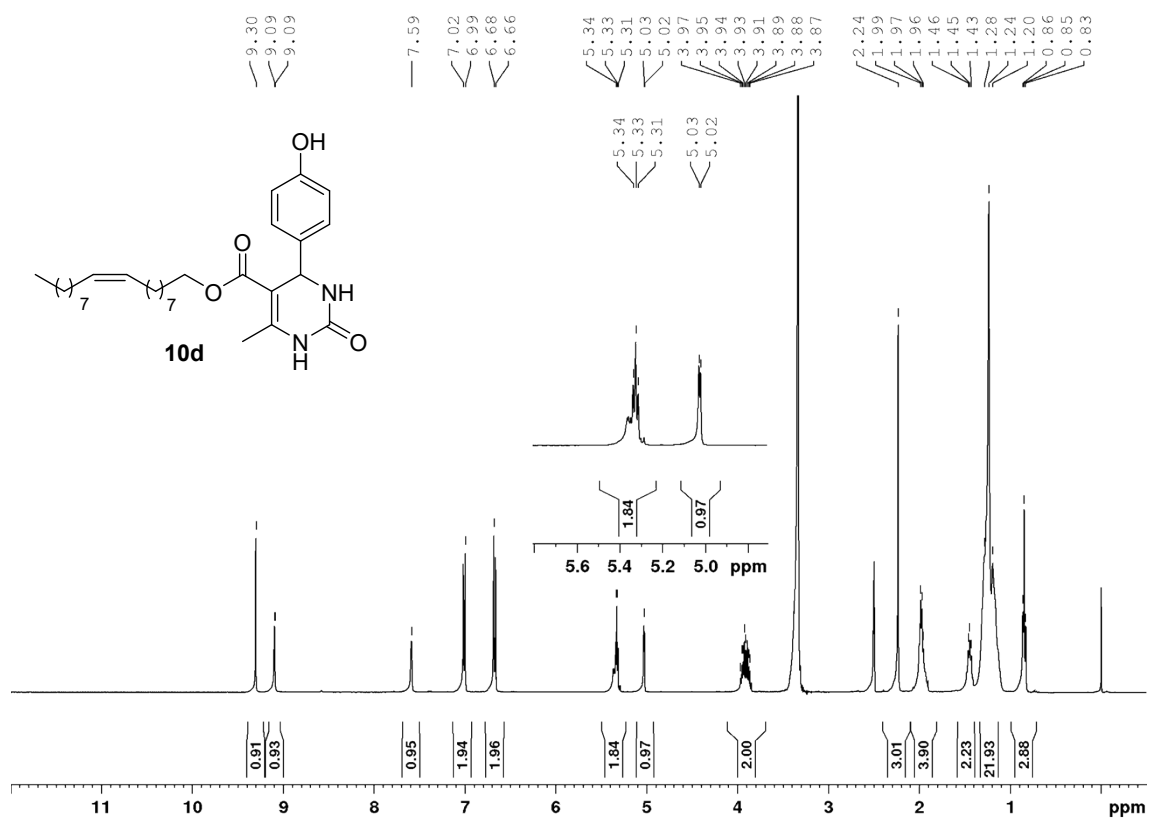

**Figure S19.**  $^1\text{H}$  NMR (400 MHz,  $\text{DMSO-d}_6$ ) spectrum of **10d**

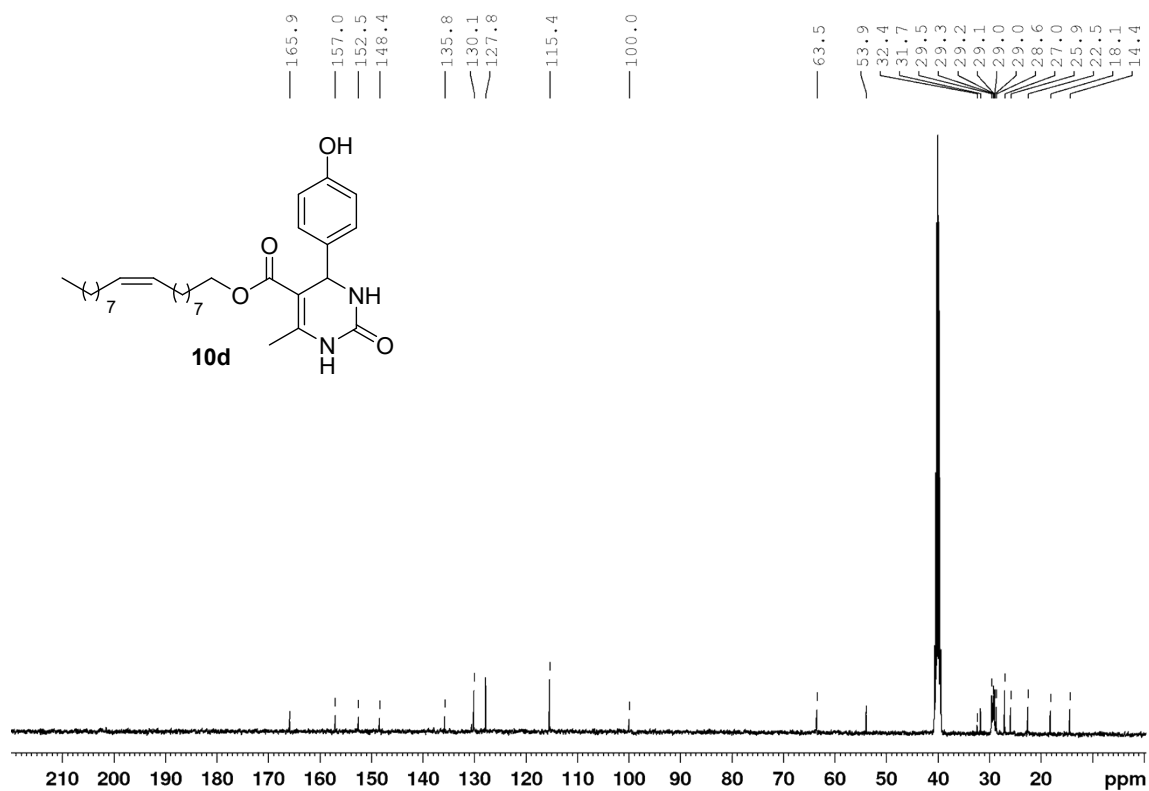

**Figure S20.**  $^{13}\text{C}$  NMR (100 MHz,  $\text{DMSO-d}_6$ ) spectrum of **10d**

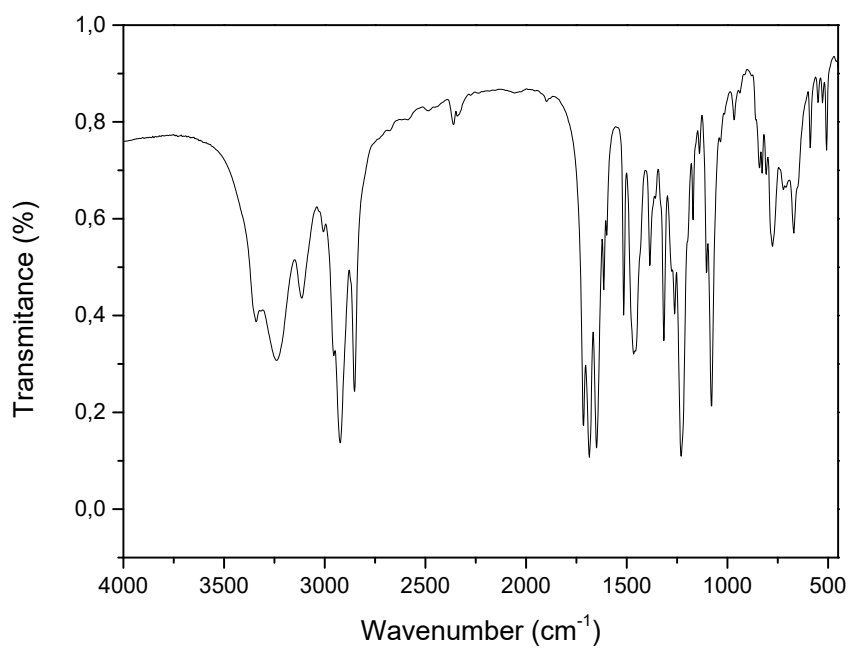

**Figure S21.** FT-IR (4000-400  $\text{cm}^{-1}$ , KBr) spectrum of **10d**

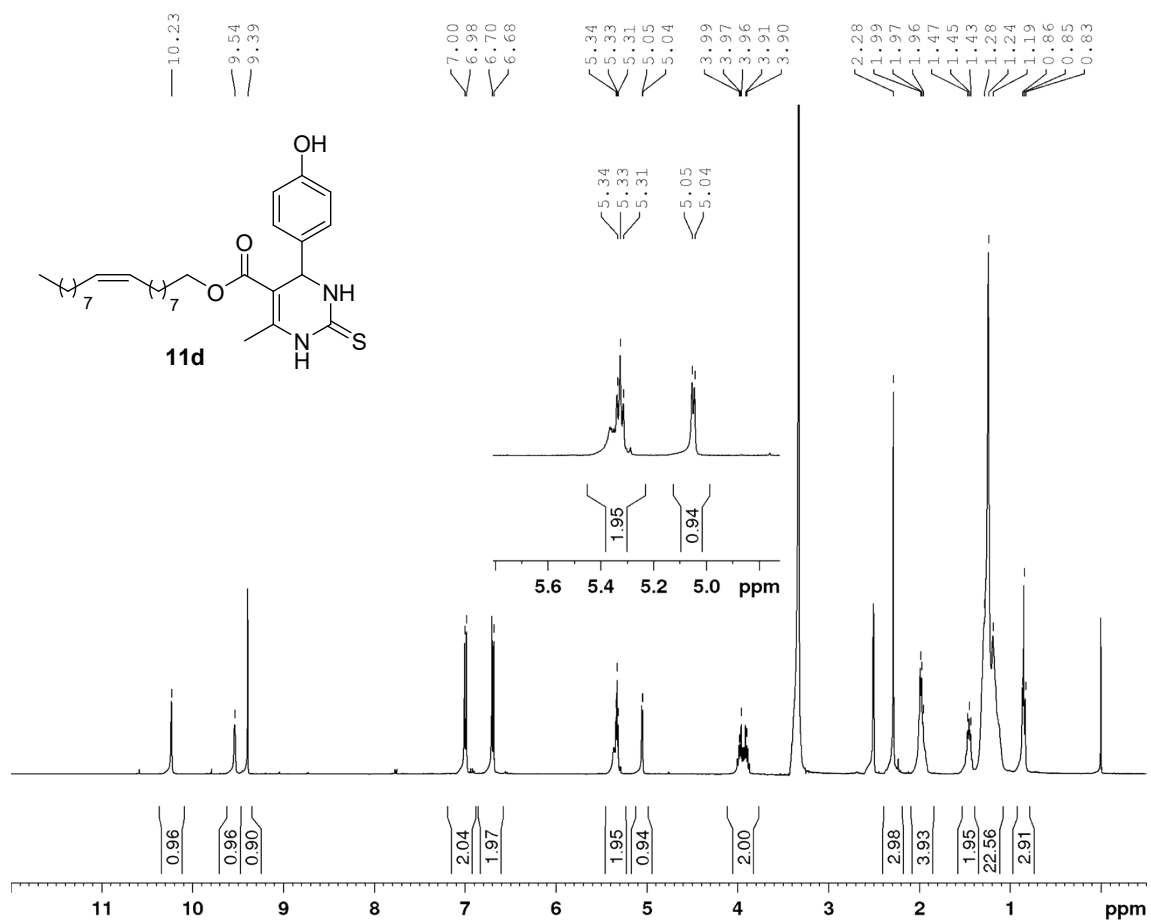

**Figure S22.**  $^1\text{H}$  NMR (400 MHz,  $\text{DMSO-d}_6$ ) spectrum of **11d**

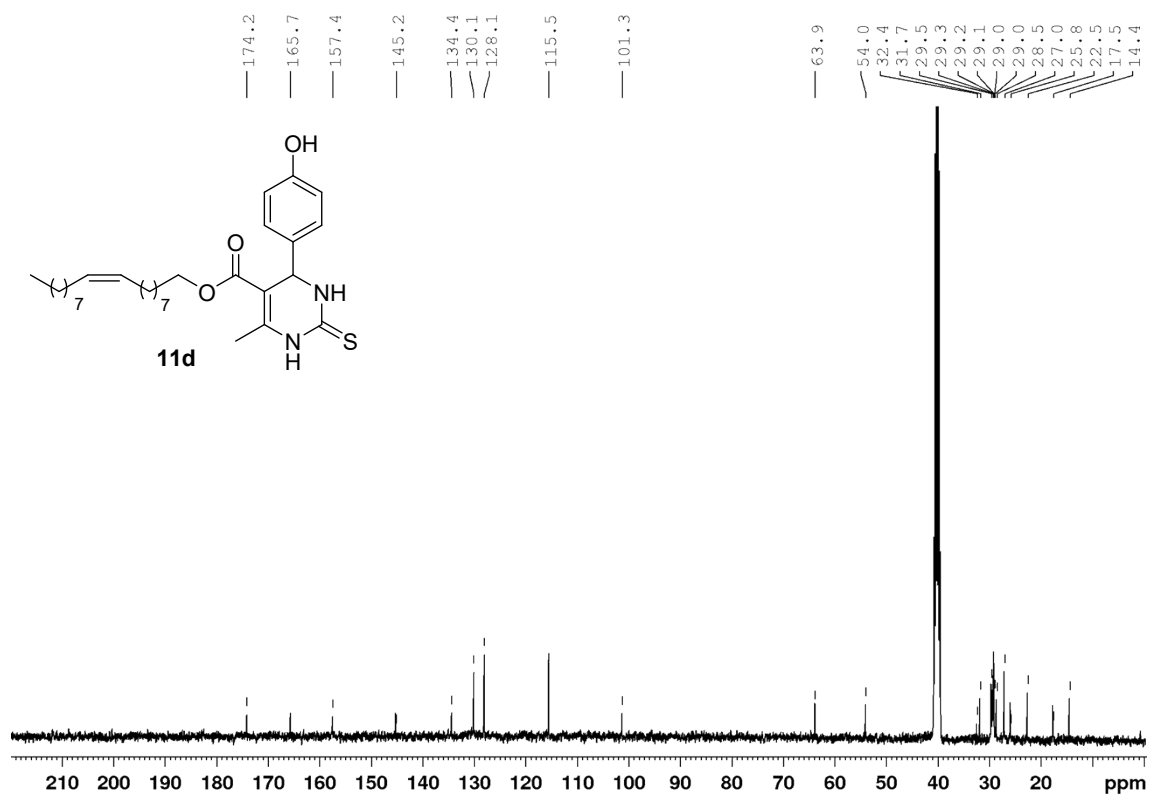

**Figure S23.** <sup>13</sup>C NMR (100 MHz, DMSO-d<sub>6</sub>) spectrum of **11d**

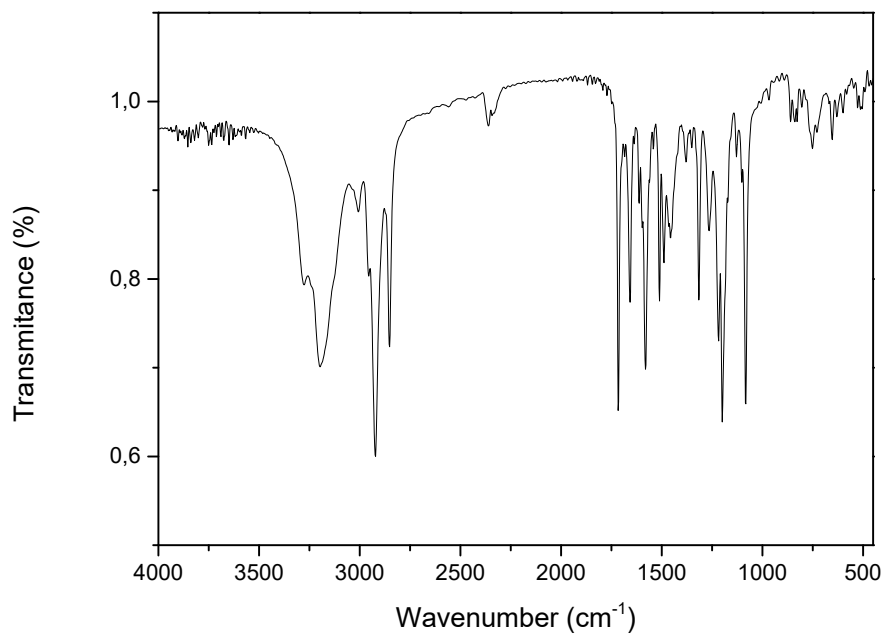

**Figure S24.** FT-IR (4000-400 cm<sup>-1</sup>, KBr) spectrum of **11d**

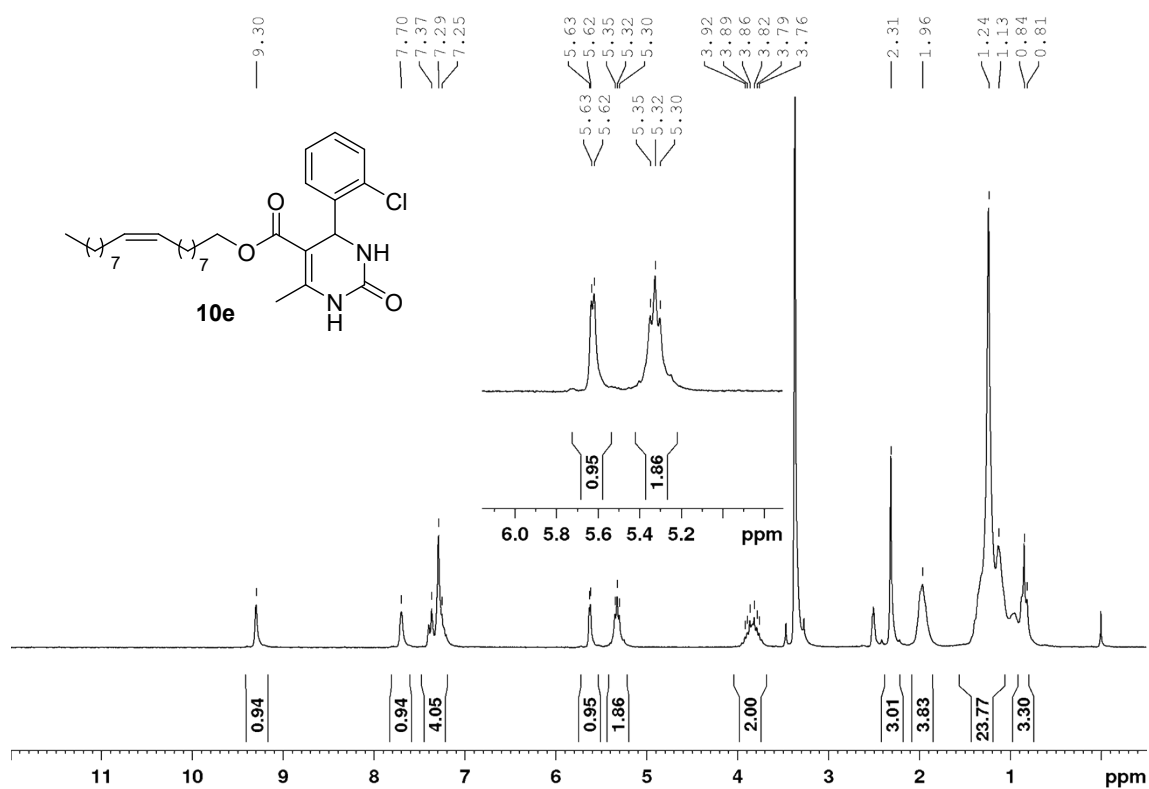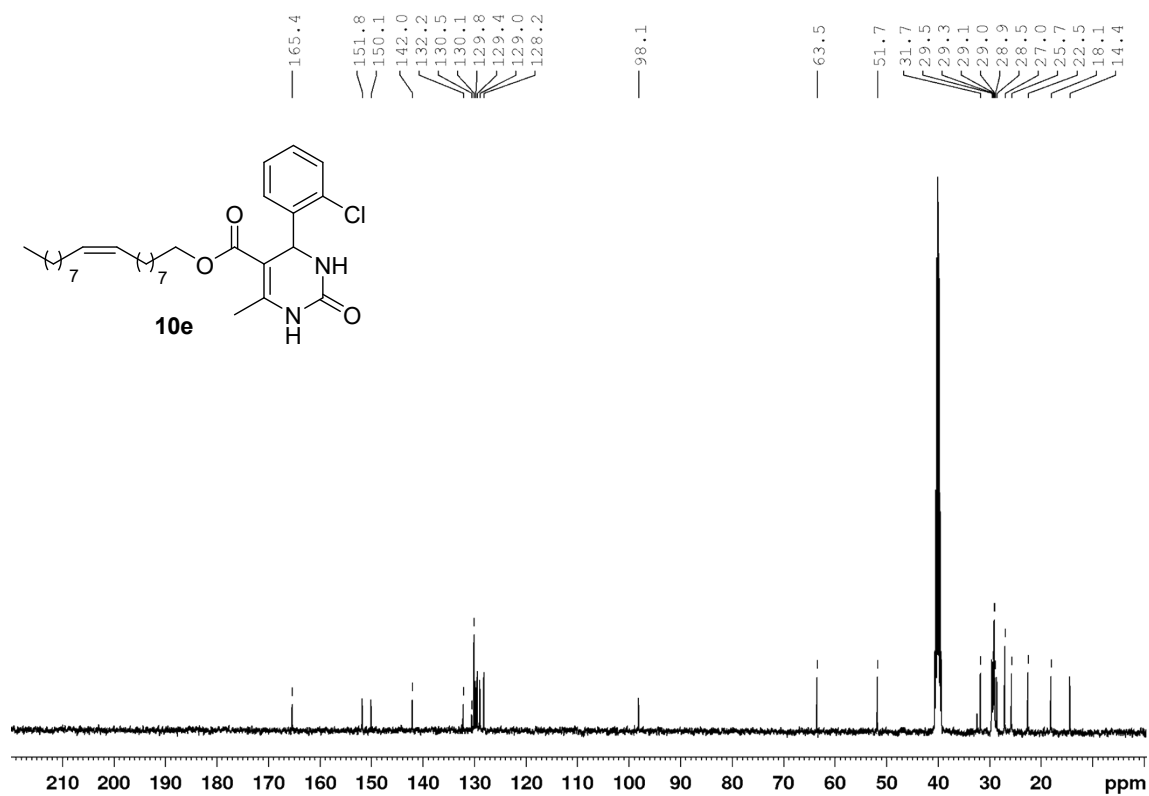

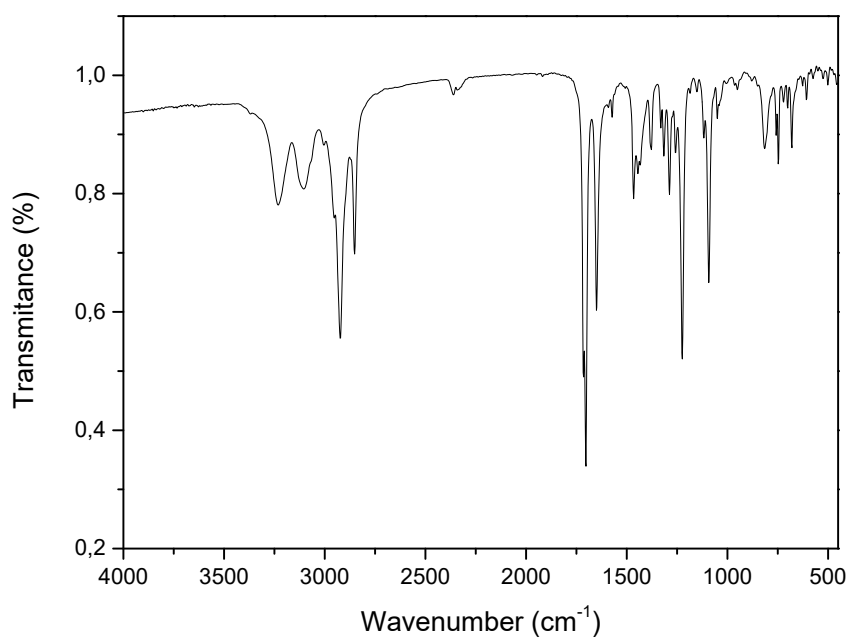

**Figure S27.** FT-IR (4000-400  $\text{cm}^{-1}$ , KBr) spectrum of **10e**

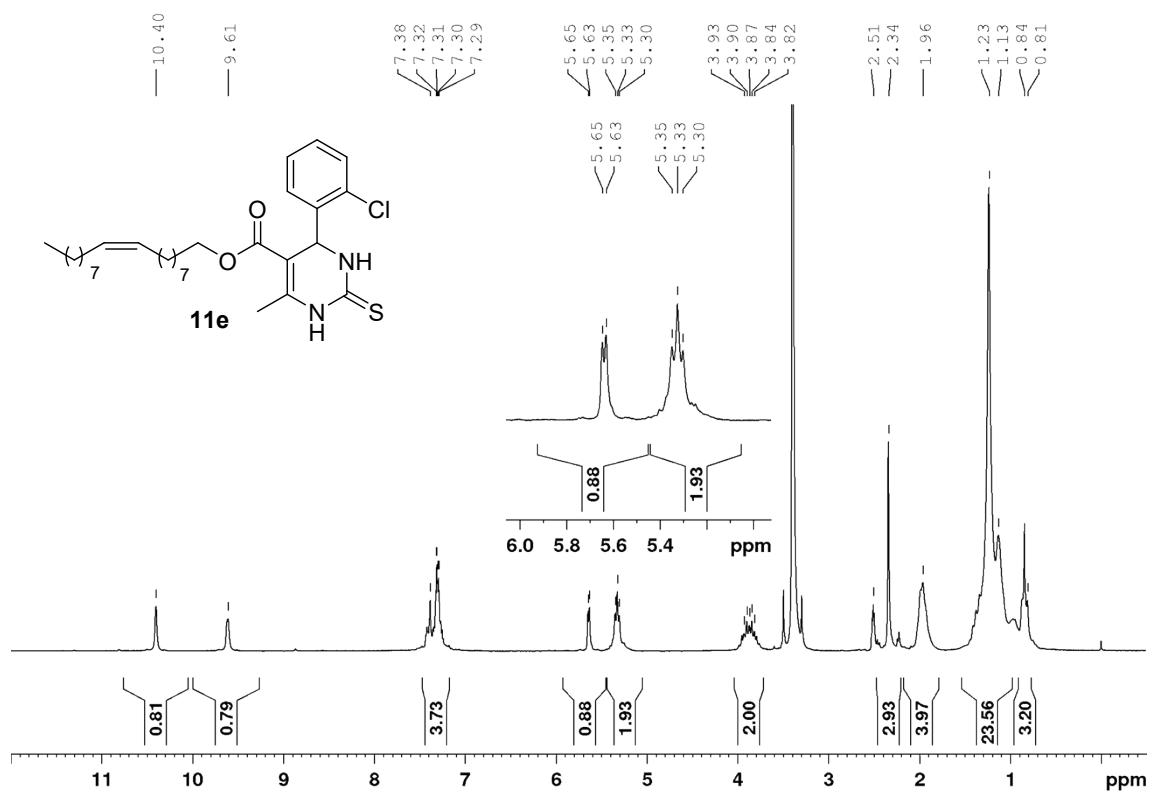

**Figure S28.**  $^1\text{H}$  NMR (400 MHz,  $\text{DMSO-d}_6$ ) spectrum of **11e**

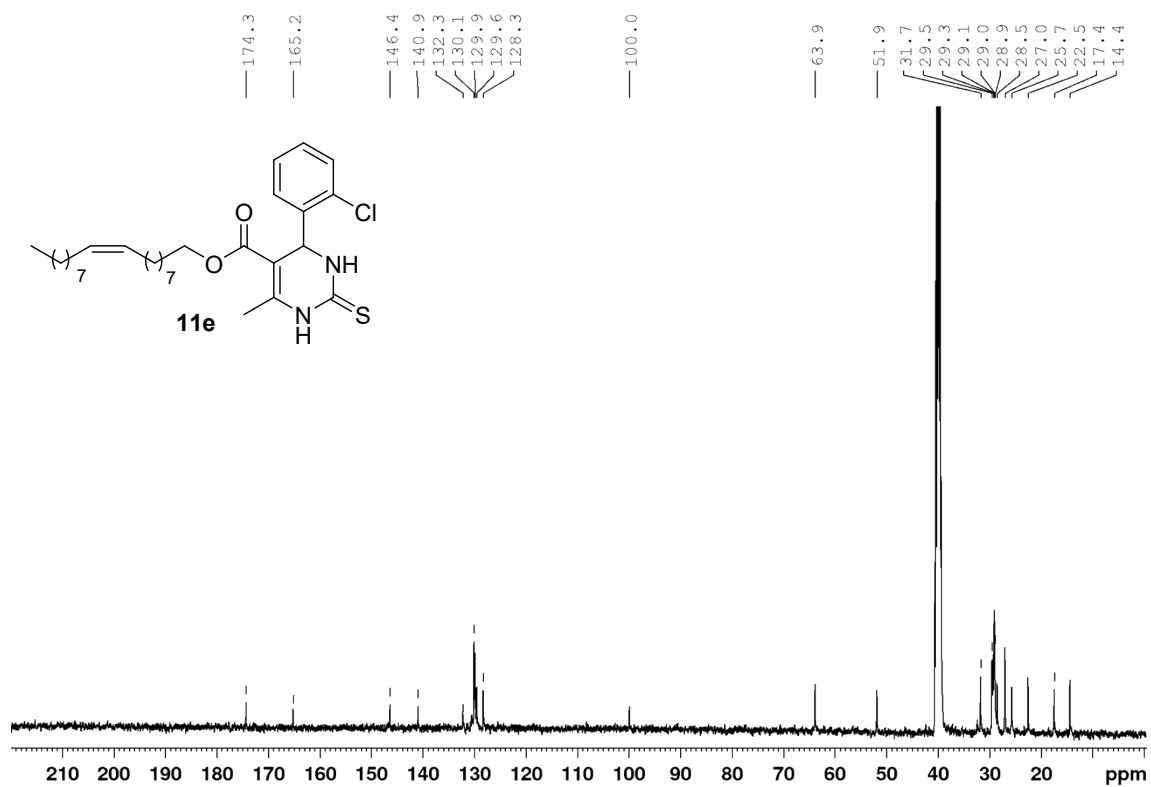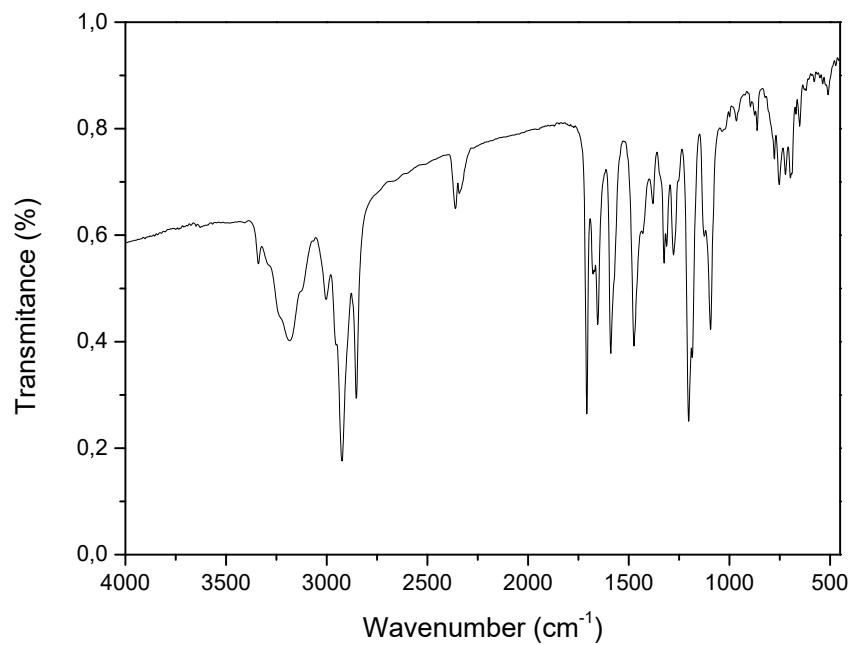



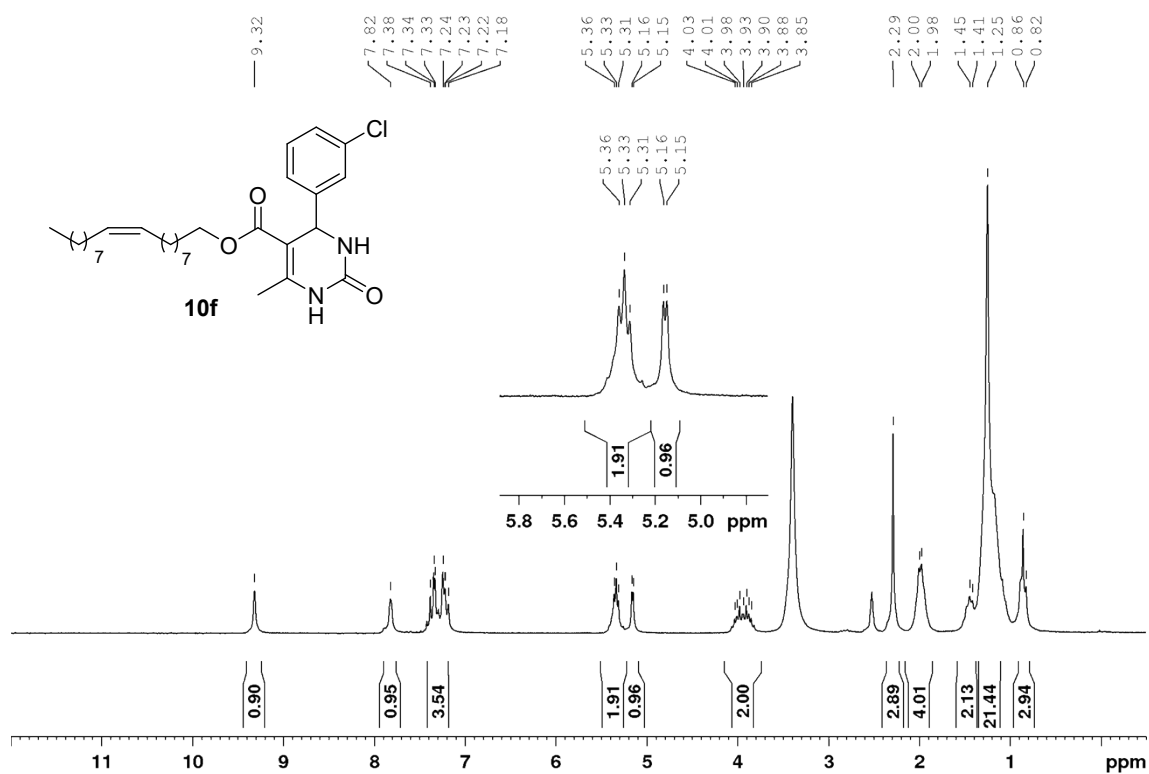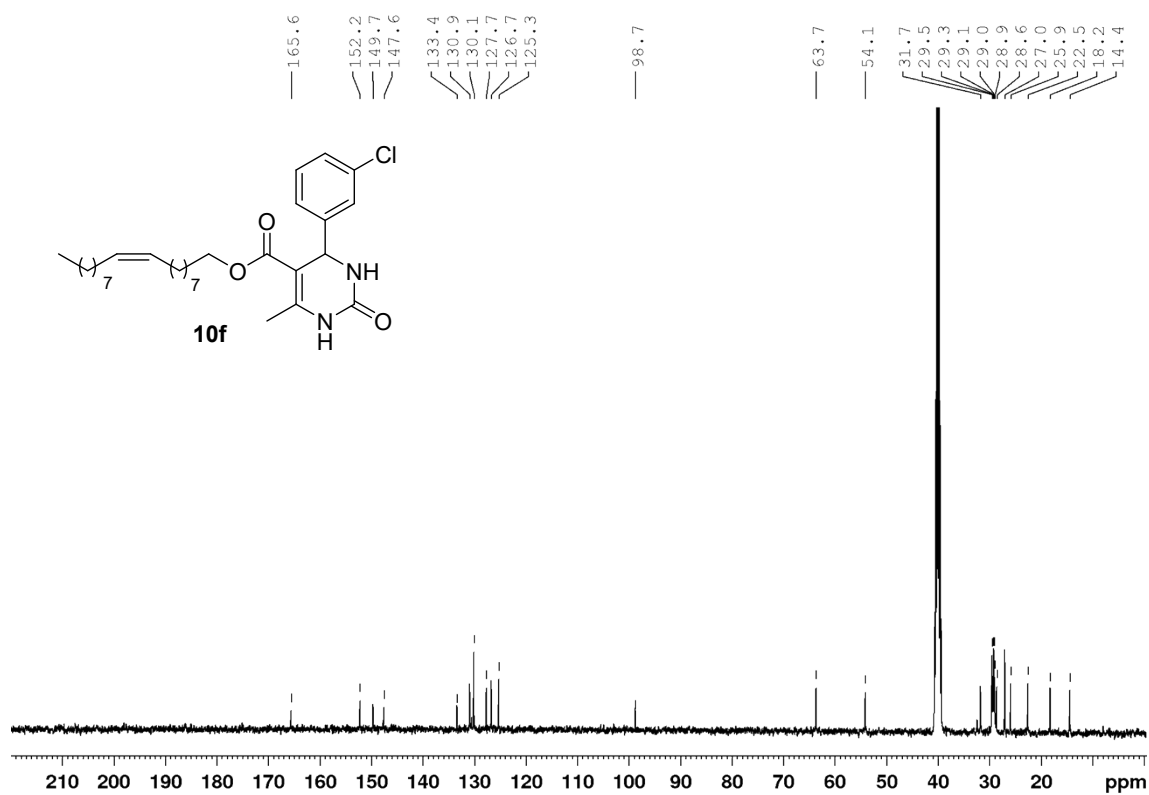

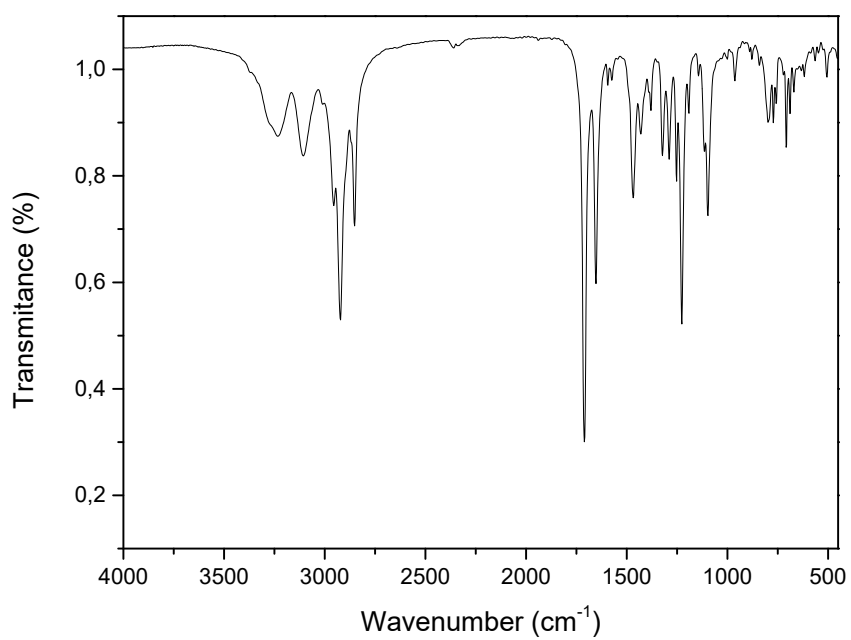

**Figure S33.** FT-IR (4000-400  $\text{cm}^{-1}$ , KBr) spectrum of **10f**

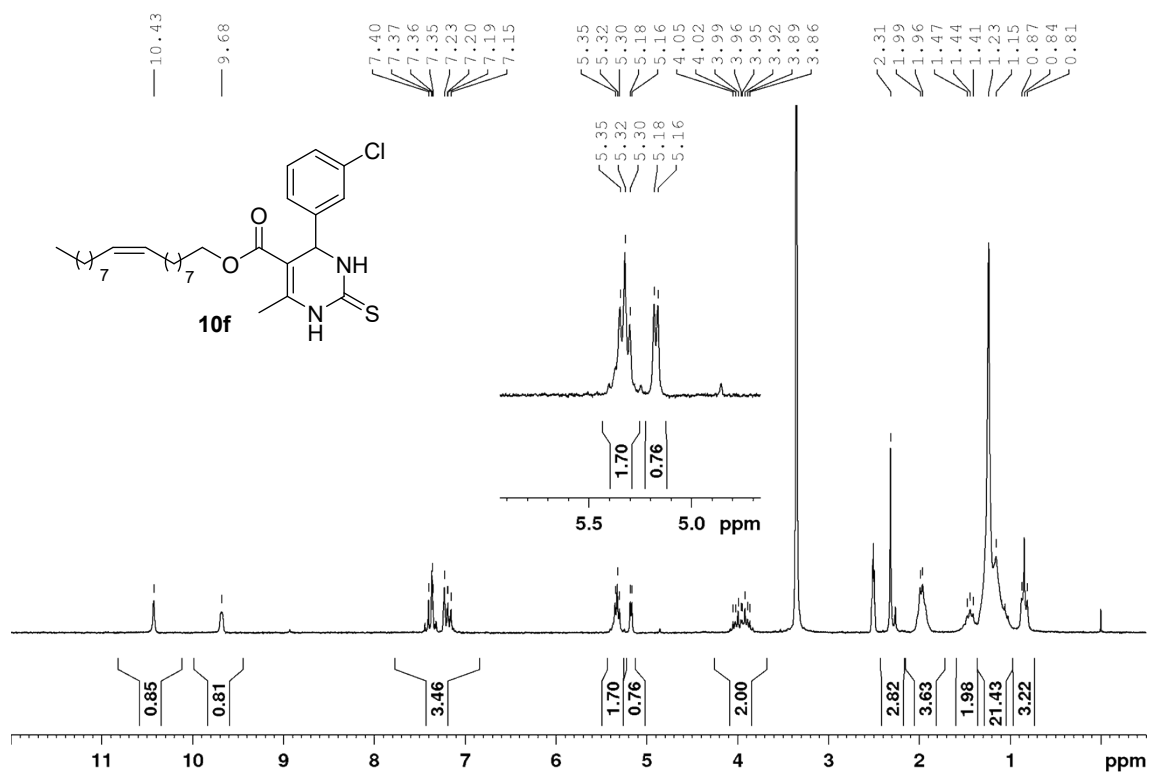

**Figure S34.**  $^1\text{H}$  NMR (400 MHz,  $\text{DMSO-d}_6$ ) spectrum of **11f**

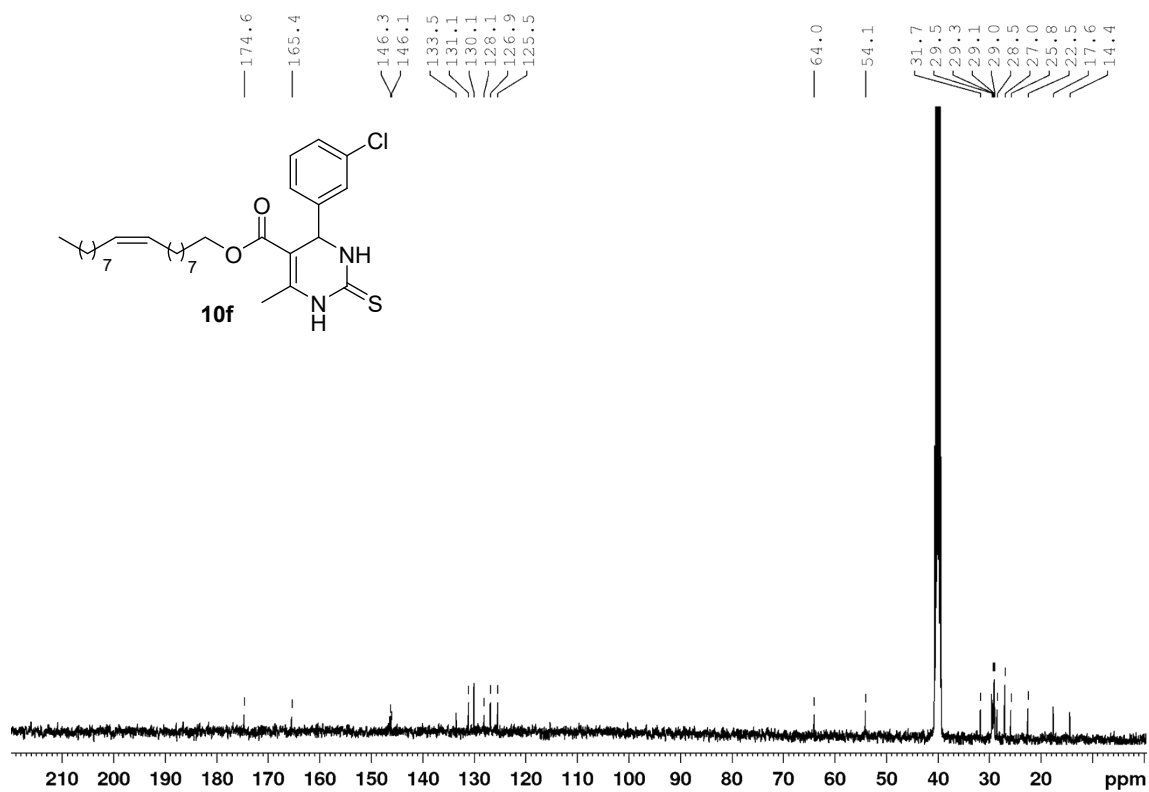

**Figure S35.** <sup>13</sup>C NMR (100 MHz, DMSO-d<sub>6</sub>) spectrum of **11f**

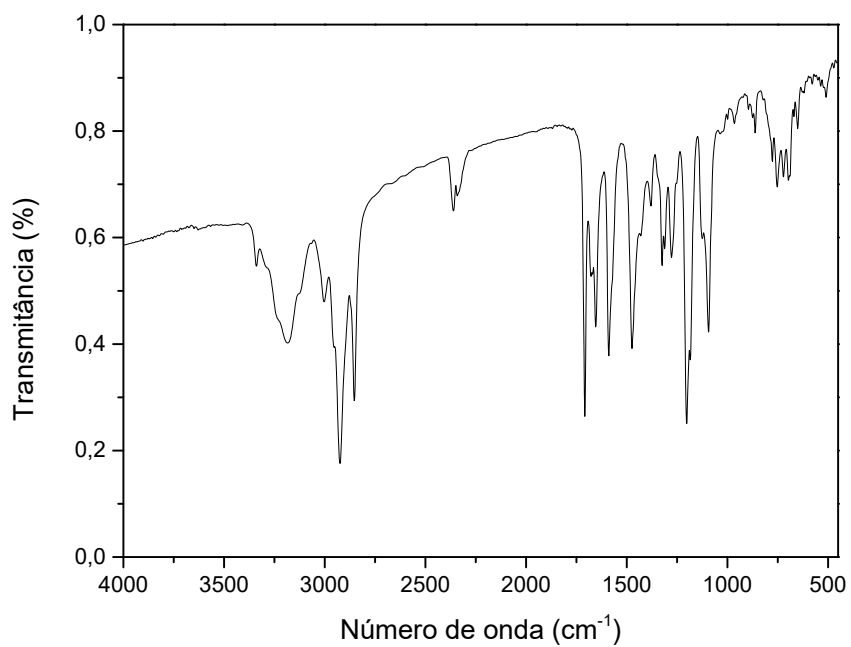

**Figure S36.** FT-IR (4000-400 cm<sup>-1</sup>, KBr) spectrum of **11f**

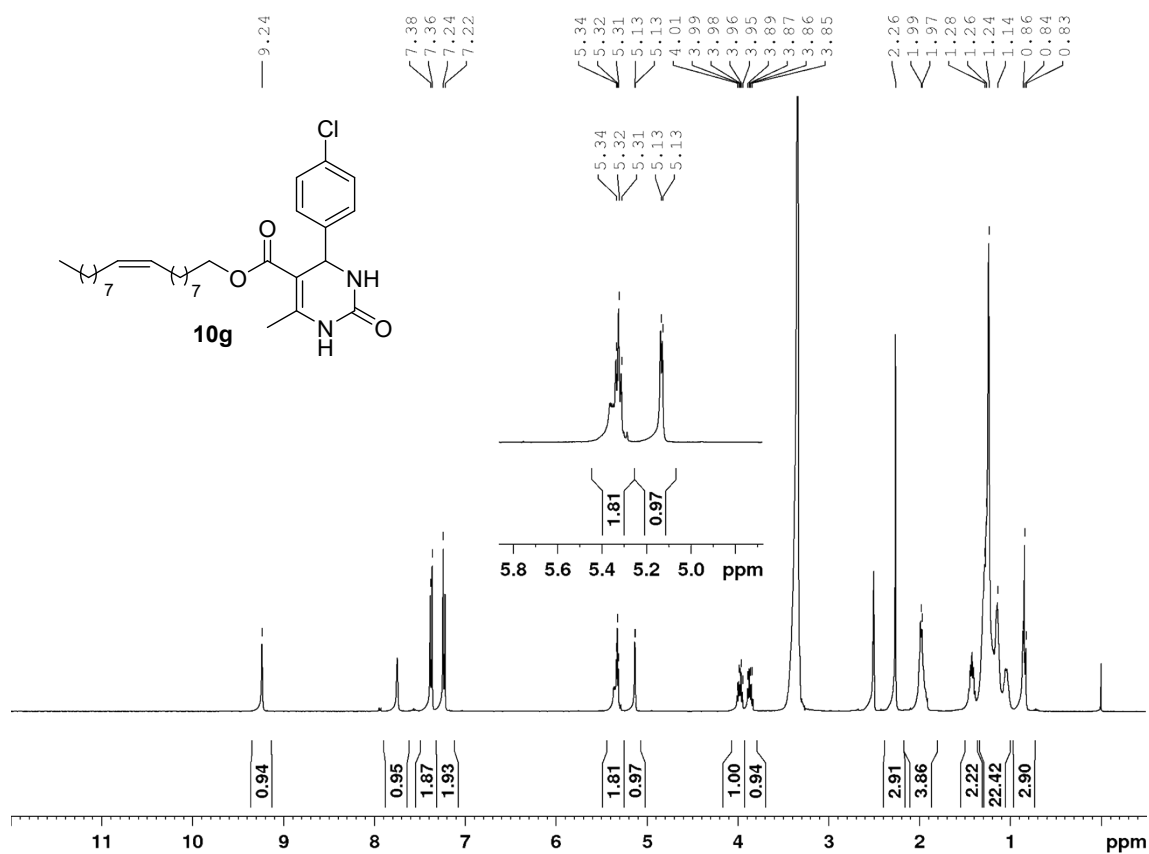

**Figure S37.  $^1\text{H}$  NMR (400 MHz,  $\text{DMSO-d}_6$ ) spectrum of **10g****

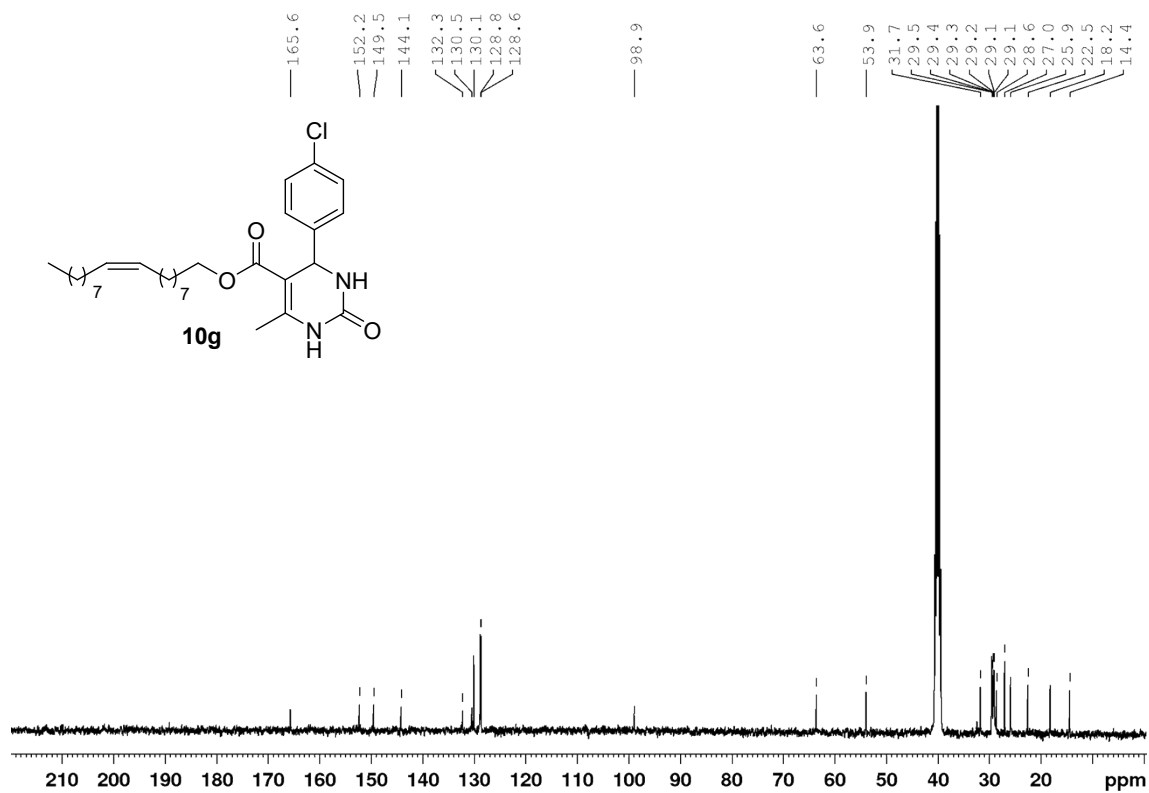

**Figure S38.  $^{13}\text{C}$  NMR (100 MHz,  $\text{DMSO-d}_6$ ) spectrum of **10g****

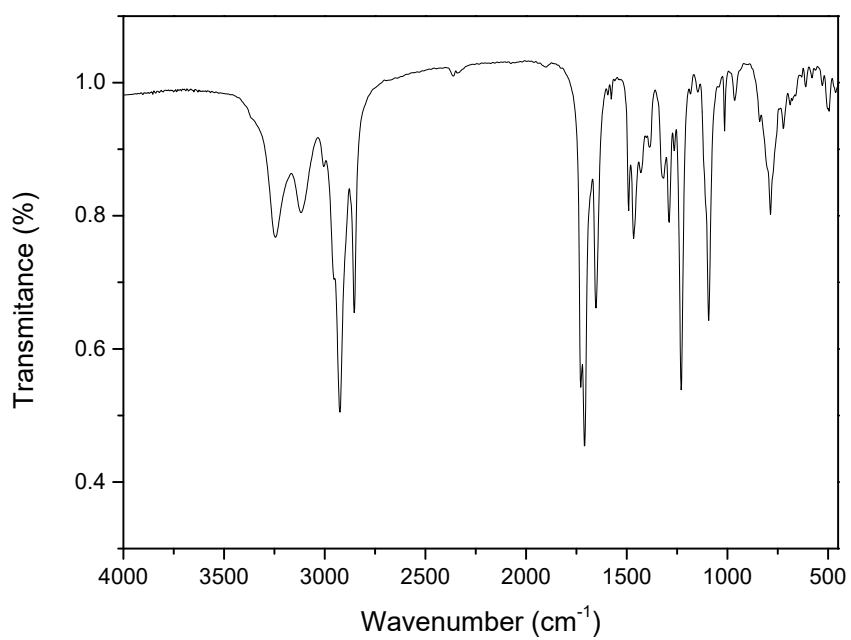

**Figure S39.** FT-IR (4000-400  $\text{cm}^{-1}$ , KBr) spectrum of **10g**

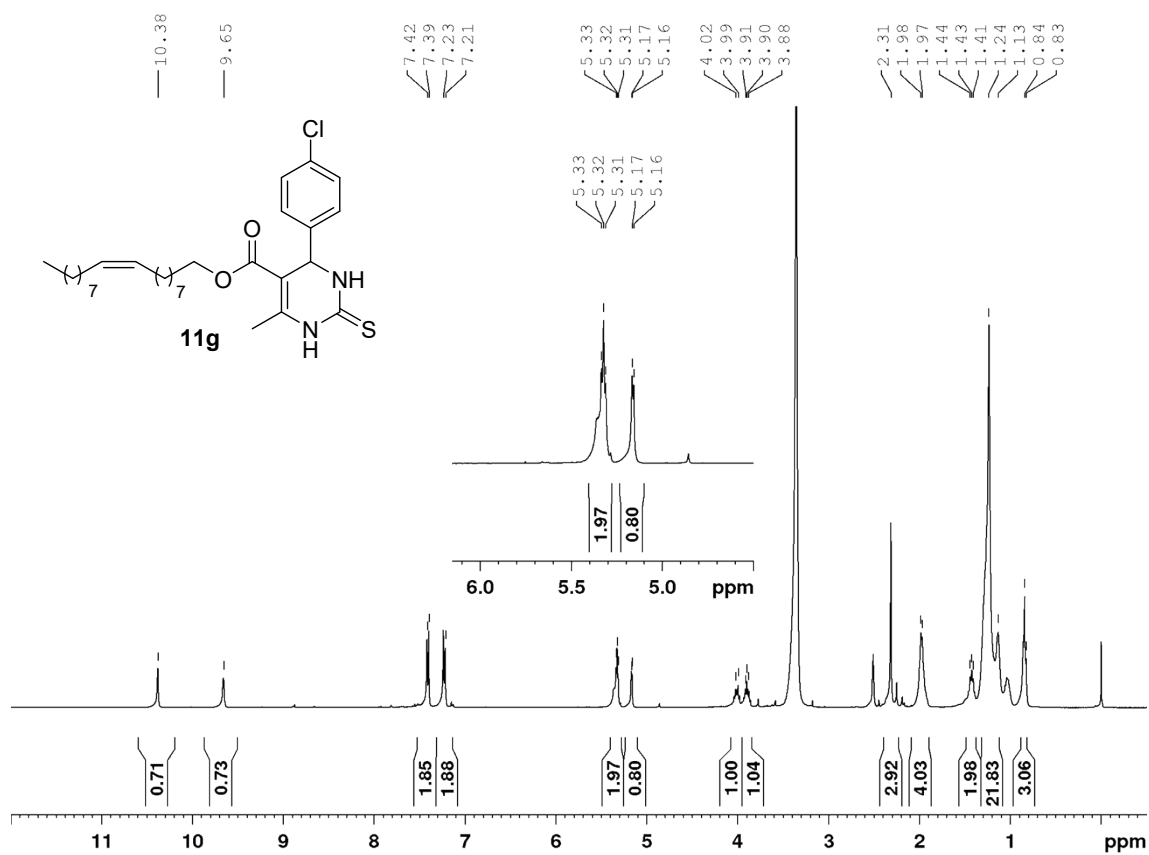

**Figure S40.**  $^1\text{H}$  NMR (400 MHz,  $\text{DMSO-d}_6$ ) spectrum of **11g**

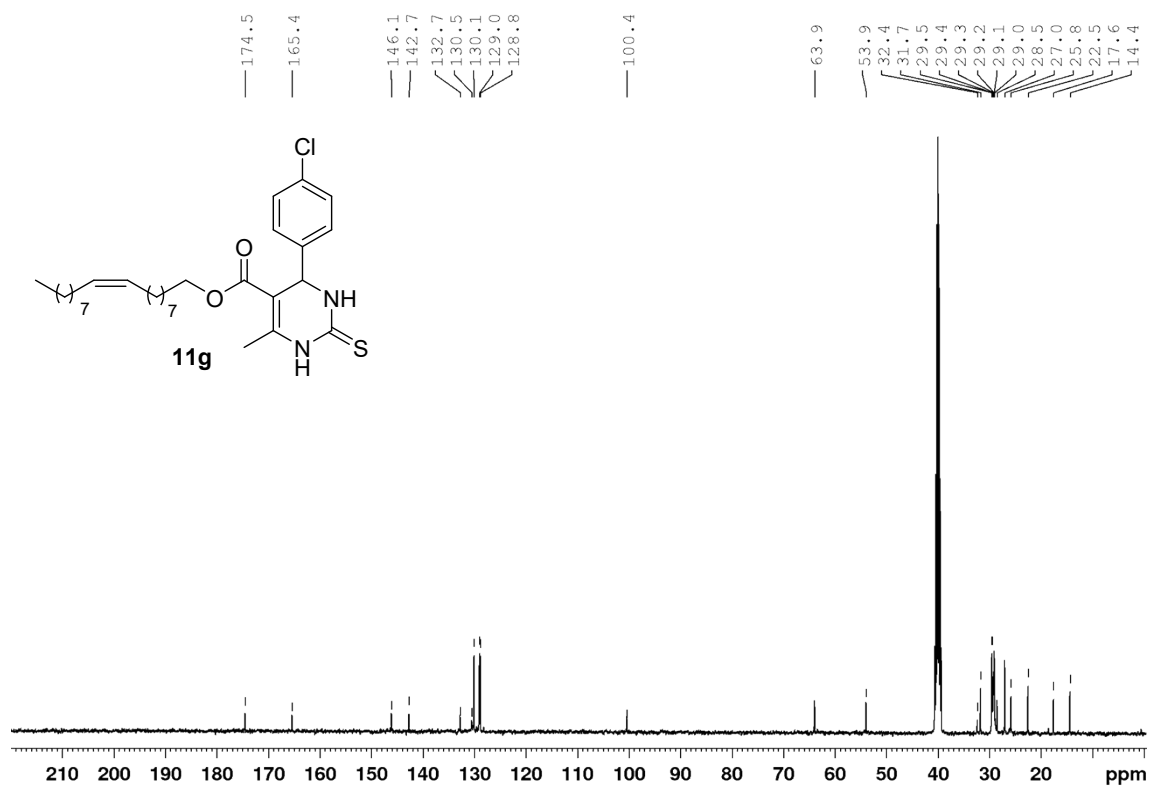

**Figure S41.** <sup>13</sup>C NMR (100 MHz, DMSO-d<sub>6</sub>) spectrum of **11g**

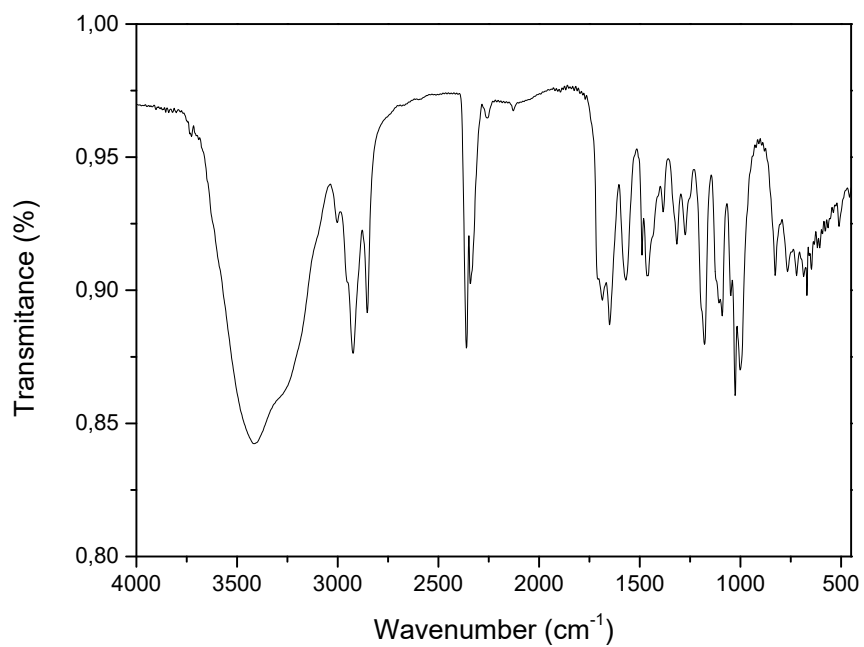

**Figure S42.** FT-IR (4000-400 cm<sup>-1</sup>, KBr) spectrum of **11g**

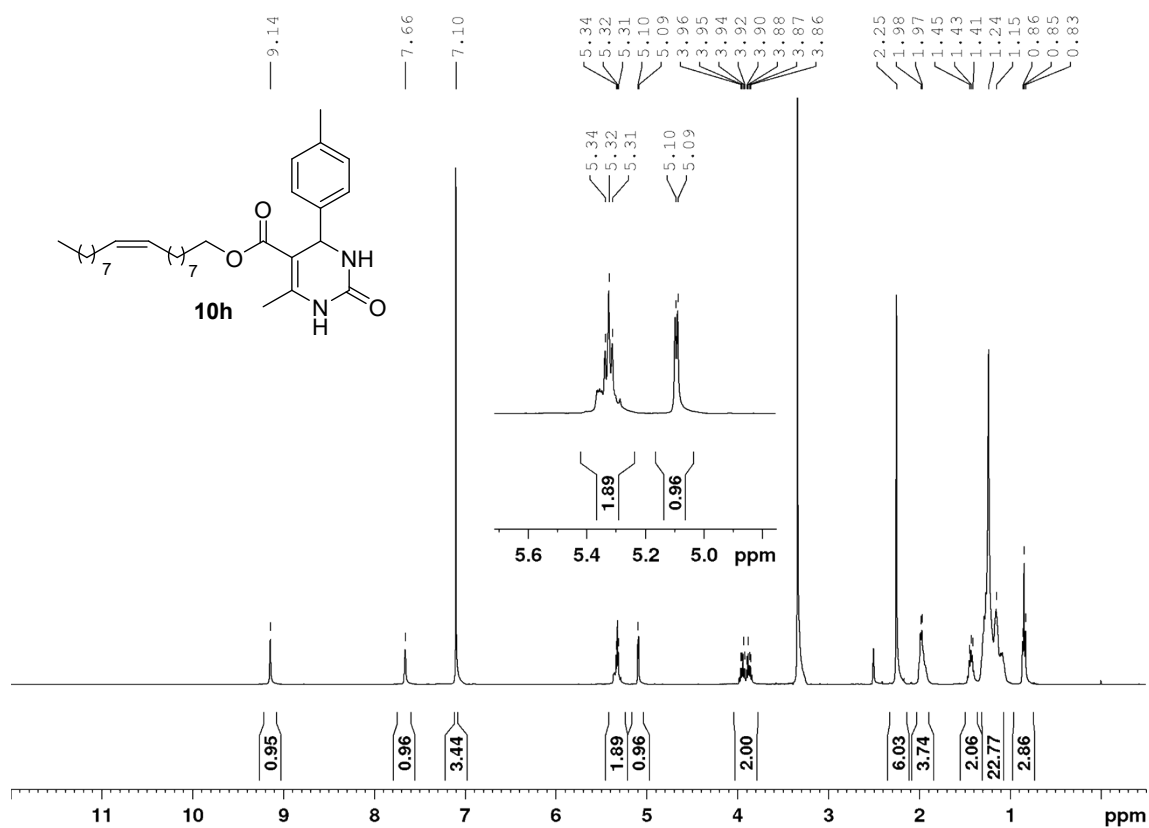

**Figure S43.**  $^1\text{H}$  NMR (400 MHz,  $\text{DMSO-d}_6$ ) spectrum of **10h**

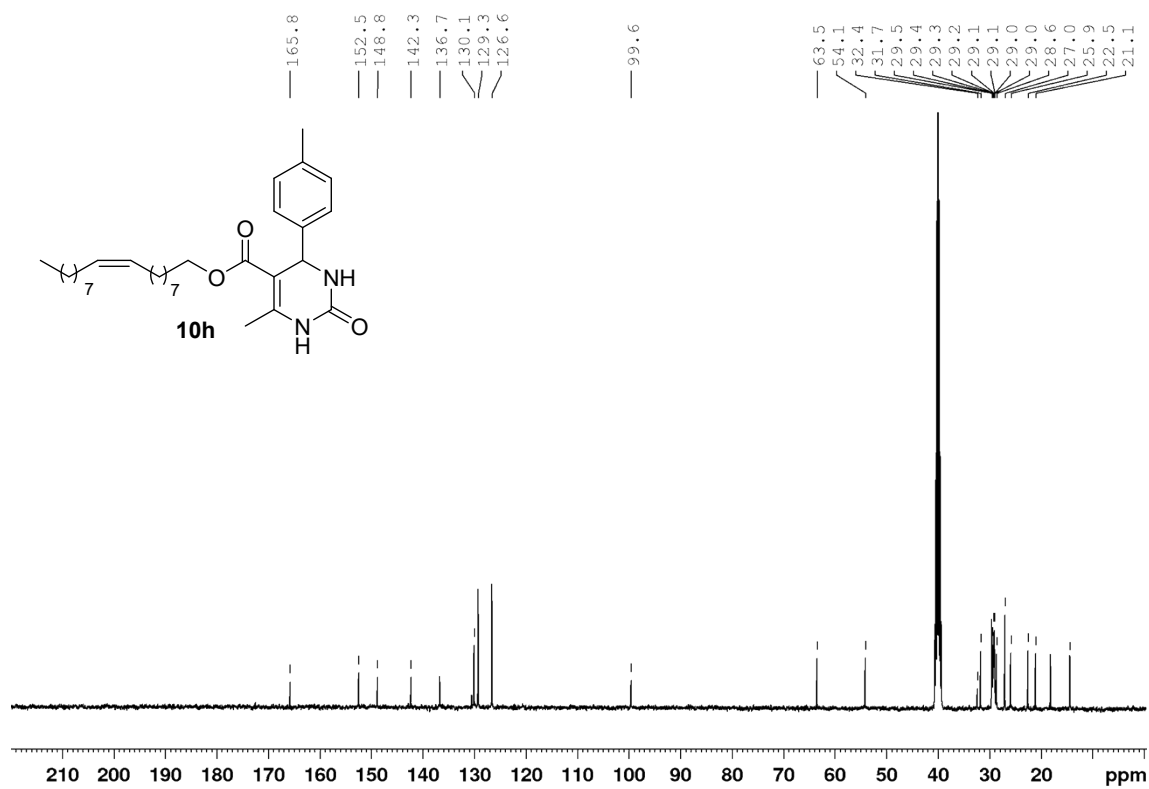

**Figure S44.**  $^{13}\text{C}$  NMR (100 MHz,  $\text{DMSO-d}_6$ ) spectrum of **10h**

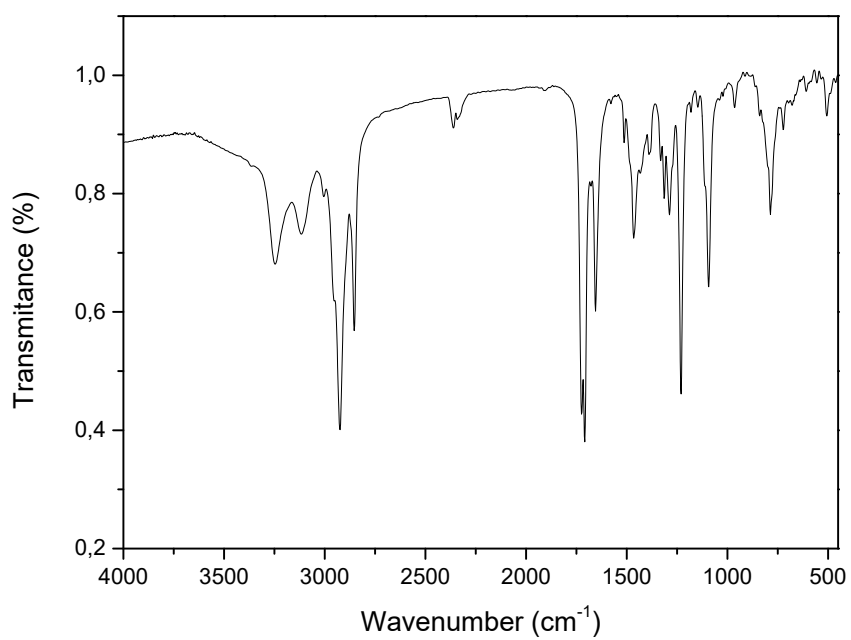

Figure S45. FT-IR (4000-400  $\text{cm}^{-1}$ , KBr) spectrum of **10h**

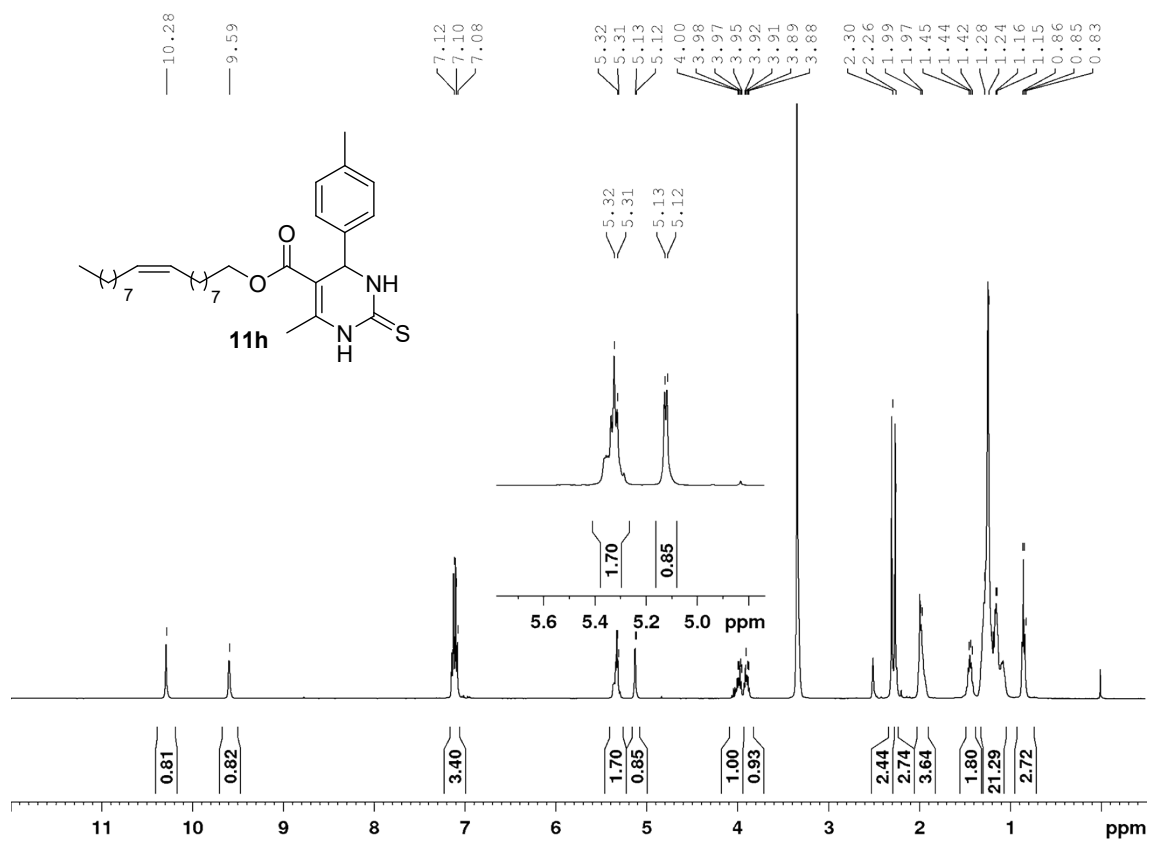

Figure S46.  $^1\text{H}$  NMR (400 MHz,  $\text{DMSO-d}_6$ ) spectrum of **11h**



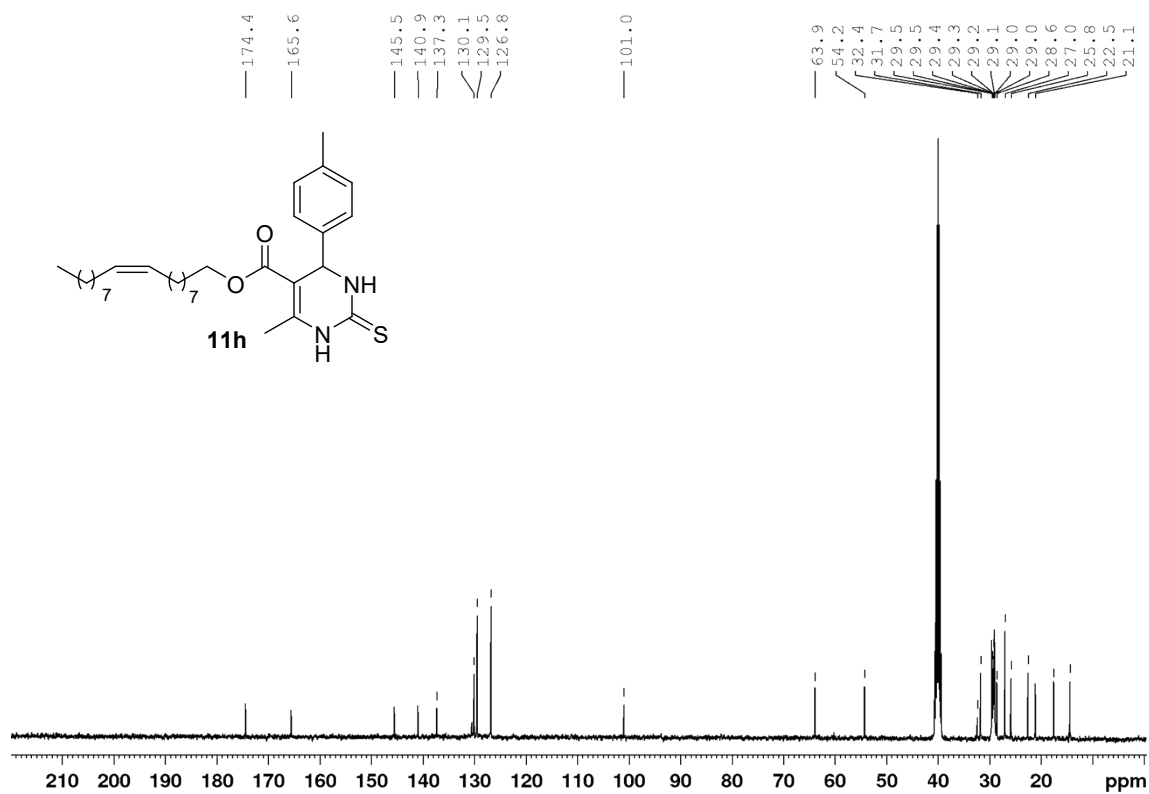

**Figure S47.**  $^{13}\text{C}$  NMR (100 MHz, DMSO- $d_6$ ) spectrum of **11h**

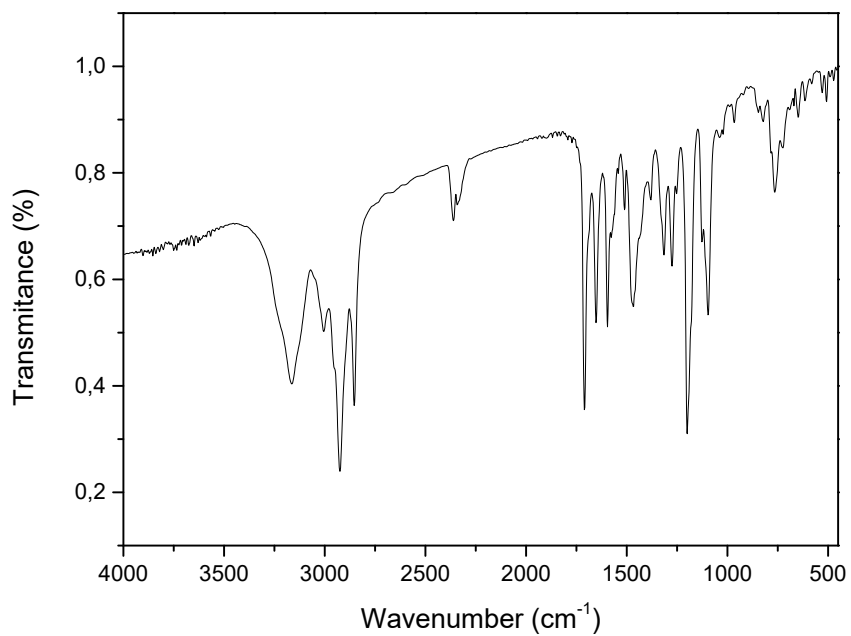

**Figure S48.** FT-IR (4000-400  $\text{cm}^{-1}$ , KBr) spectrum of **11h**

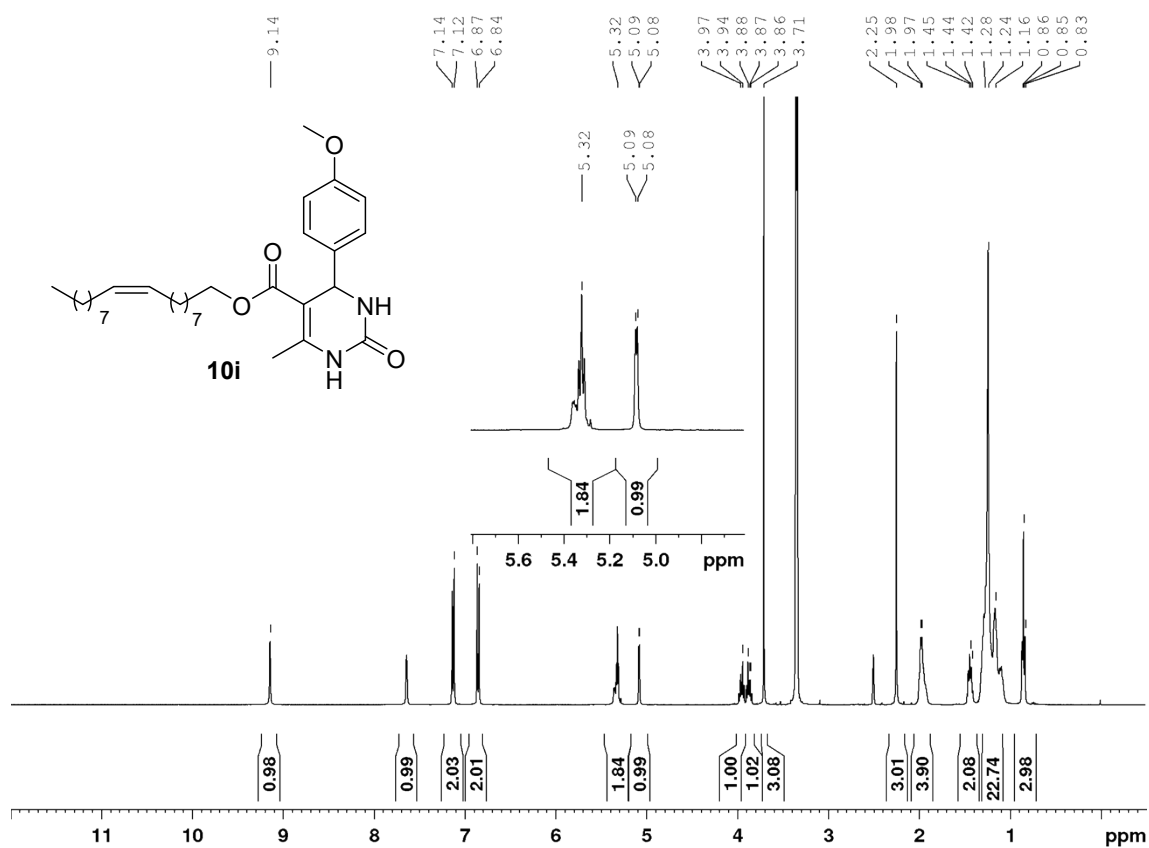

**Figure S49.**  $^1\text{H}$  NMR (400 MHz,  $\text{DMSO-d}_6$ ) spectrum of **10i**

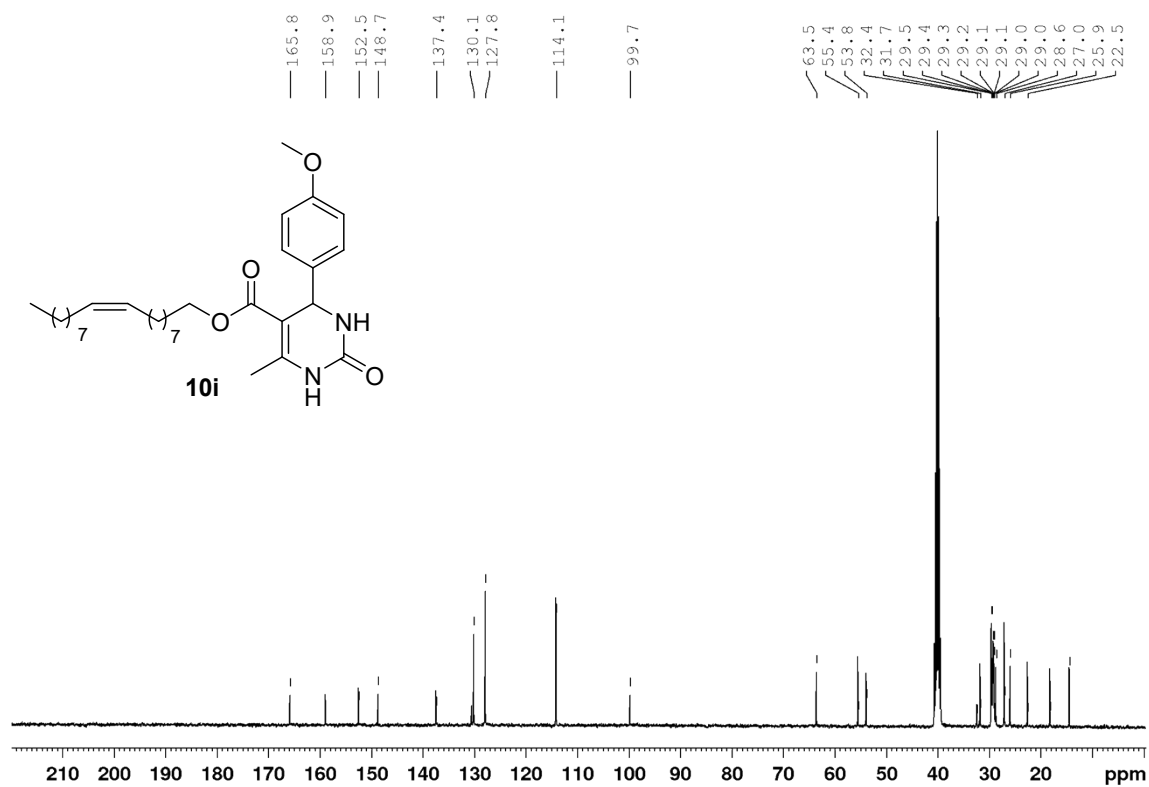

**Figure S50.**  $^{13}\text{C}$  NMR (100 MHz,  $\text{DMSO-d}_6$ ) spectrum of **10i**

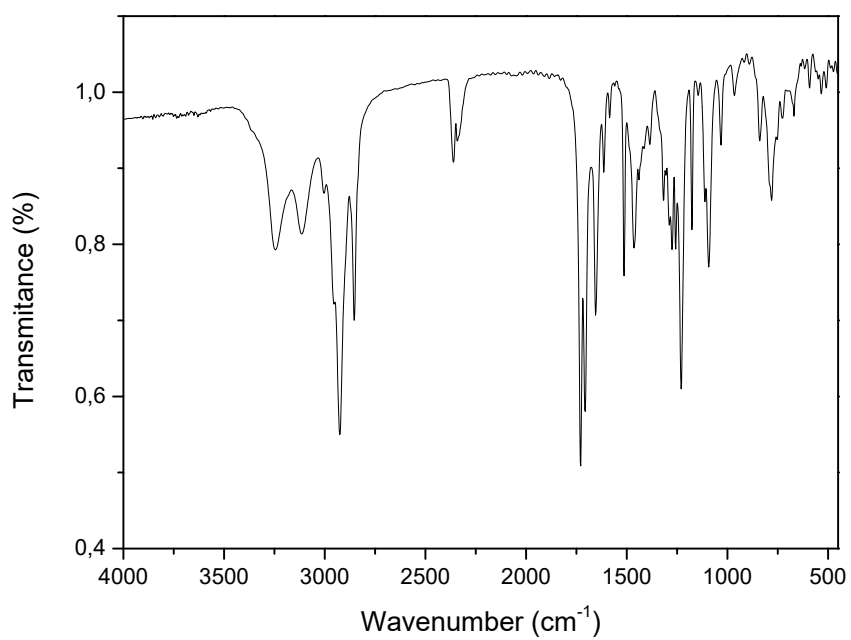

**Figure S51.** FT-IR (4000-400  $\text{cm}^{-1}$ , KBr) spectrum of **10i**

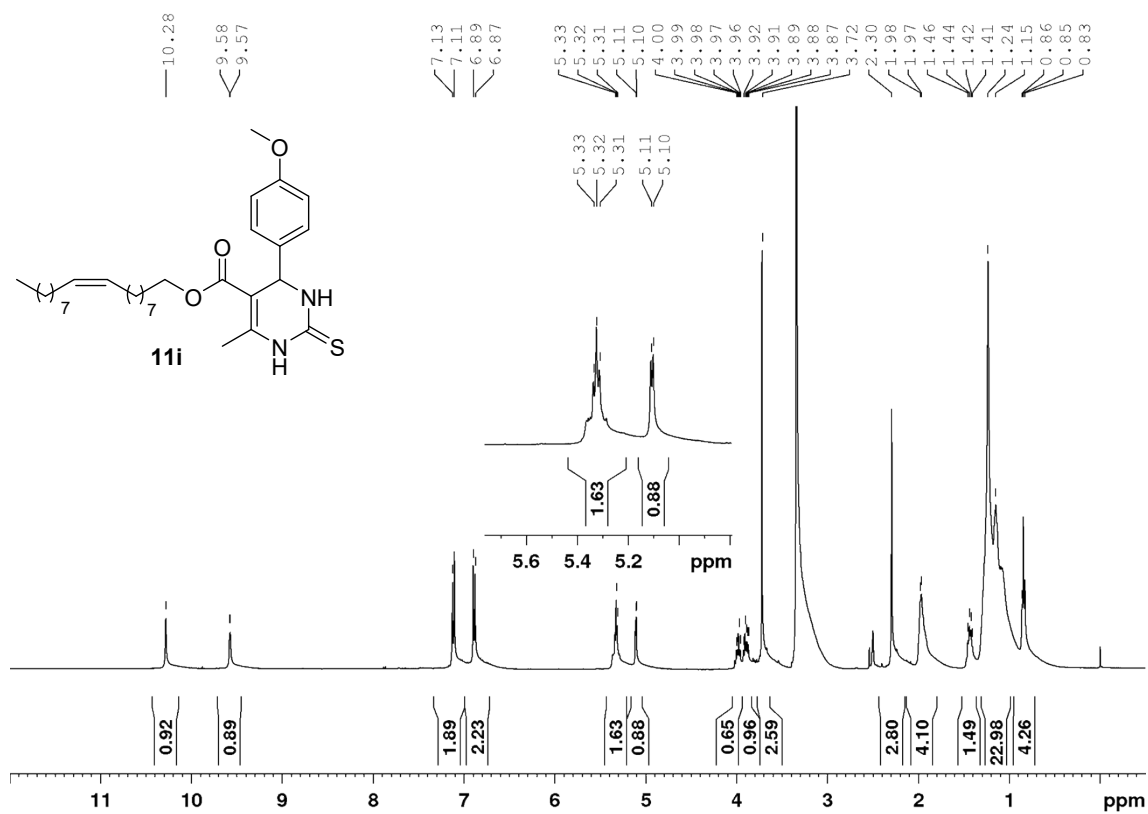

**Figure S52.**  $^1\text{H}$  NMR (400 MHz,  $\text{DMSO-d}_6$ ) spectrum of **11i**

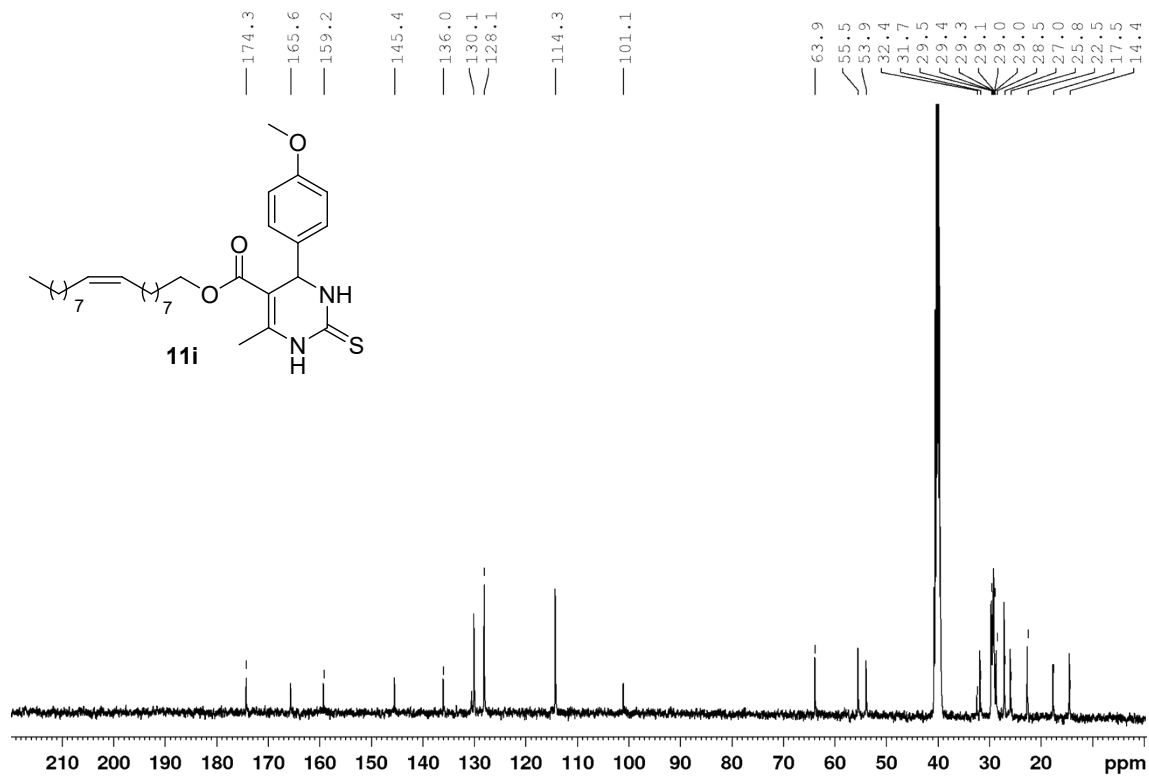

**Figure S53.** <sup>13</sup>C NMR (100 MHz, DMSO-d<sub>6</sub>) spectrum of **11i**

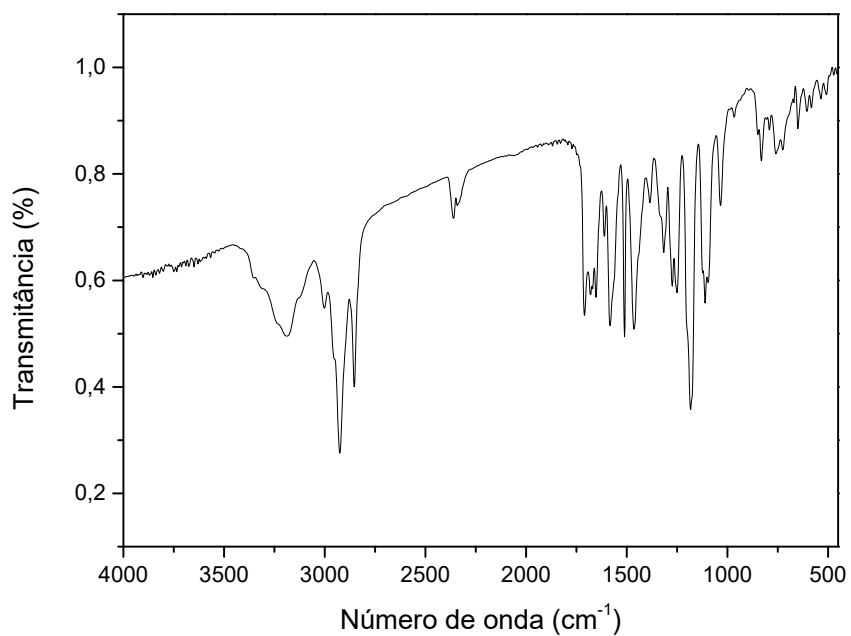

**Figure S54.** FT-IR (4000-400 cm<sup>-1</sup>, KBr) spectrum of **11i**

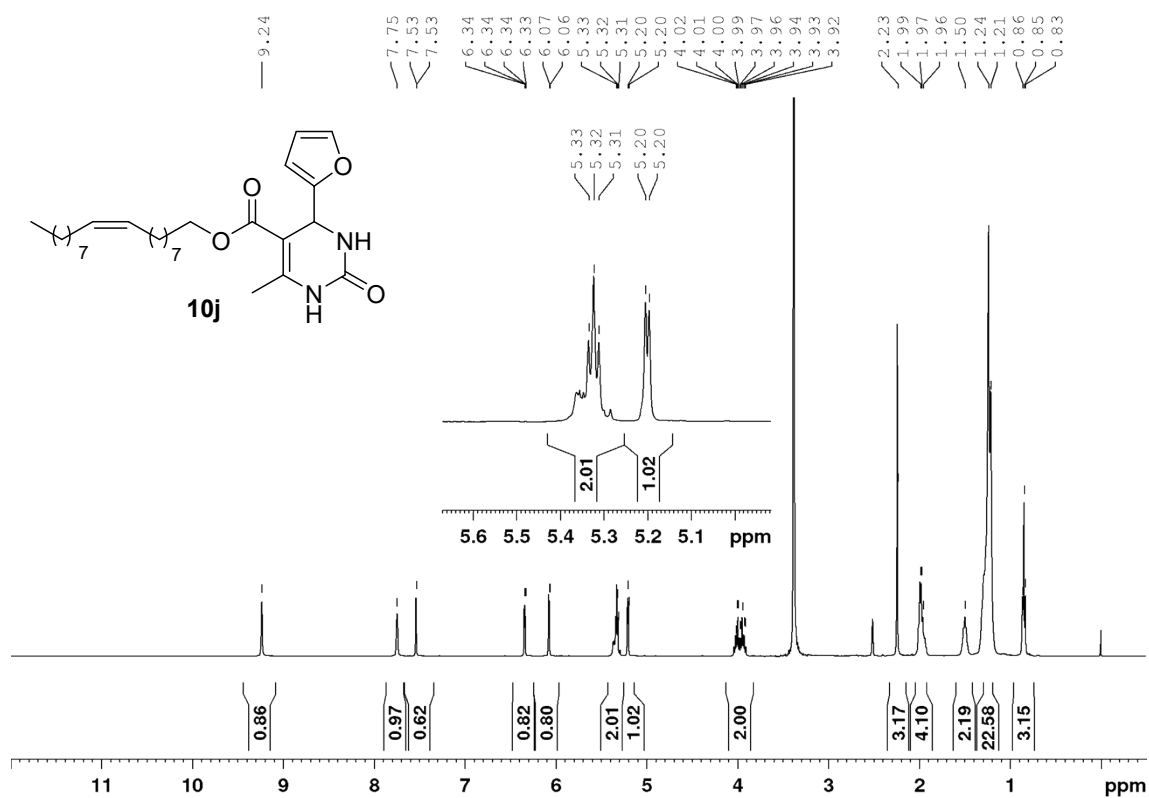

**Figure S55.  $^1\text{H}$  NMR (400 MHz, DMSO- $d_6$ ) spectrum of **10j****

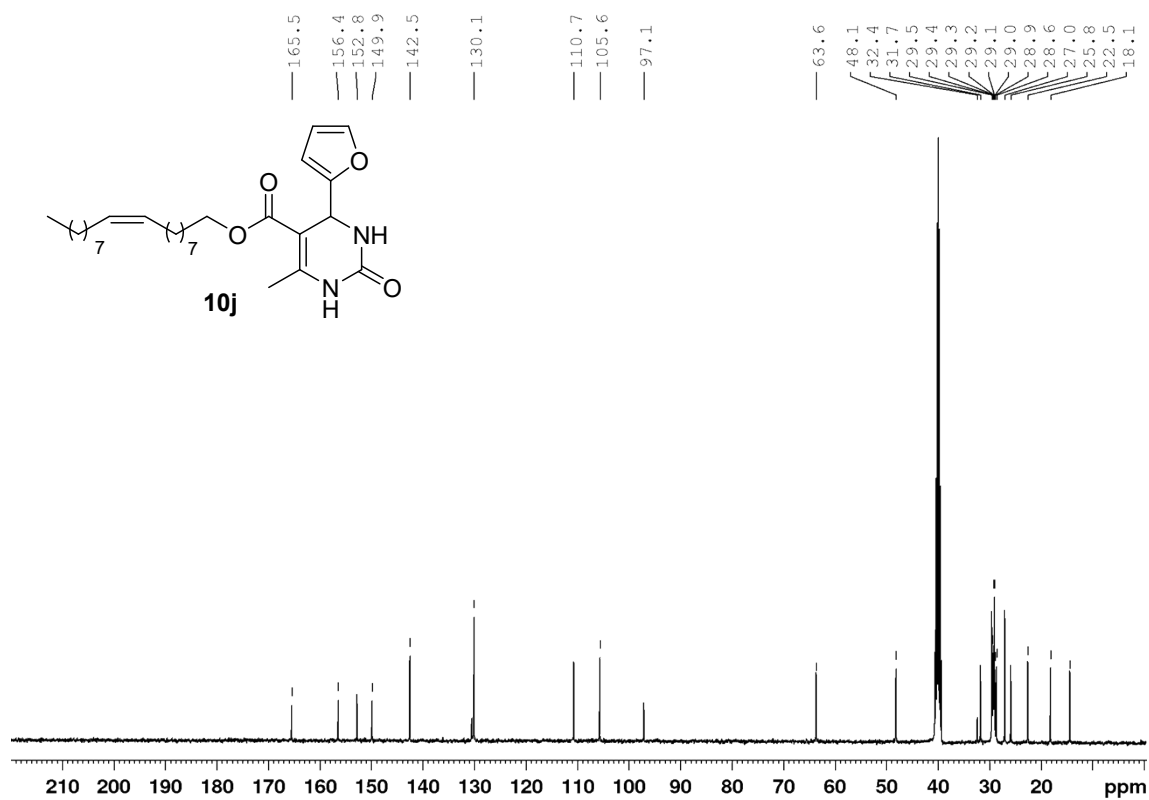

**Figure S56.  $^{13}\text{C}$  NMR (100 MHz, DMSO- $d_6$ ) spectrum of **10j****

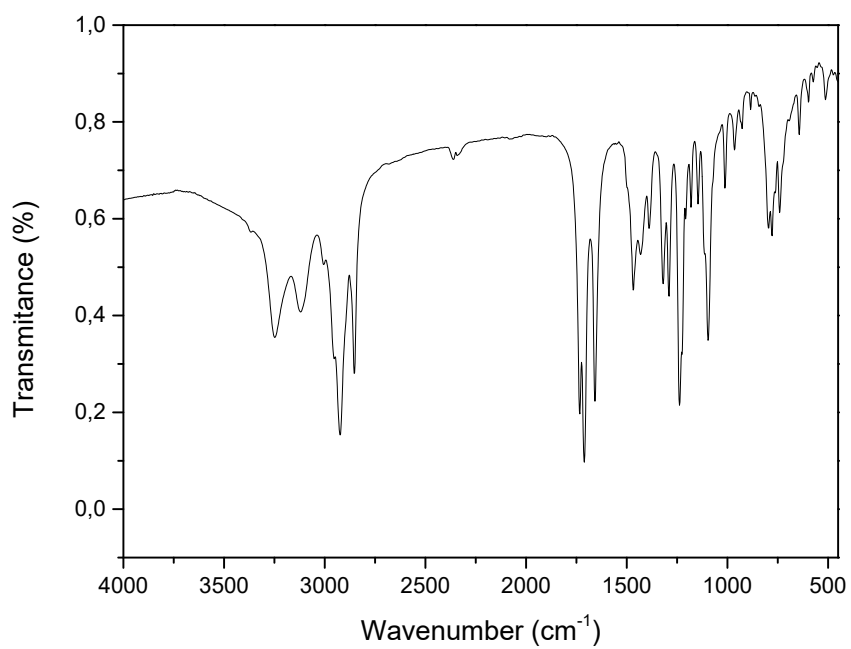

Figure S57. FT-IR (4000-400  $\text{cm}^{-1}$ , KBr) spectrum of **10j**

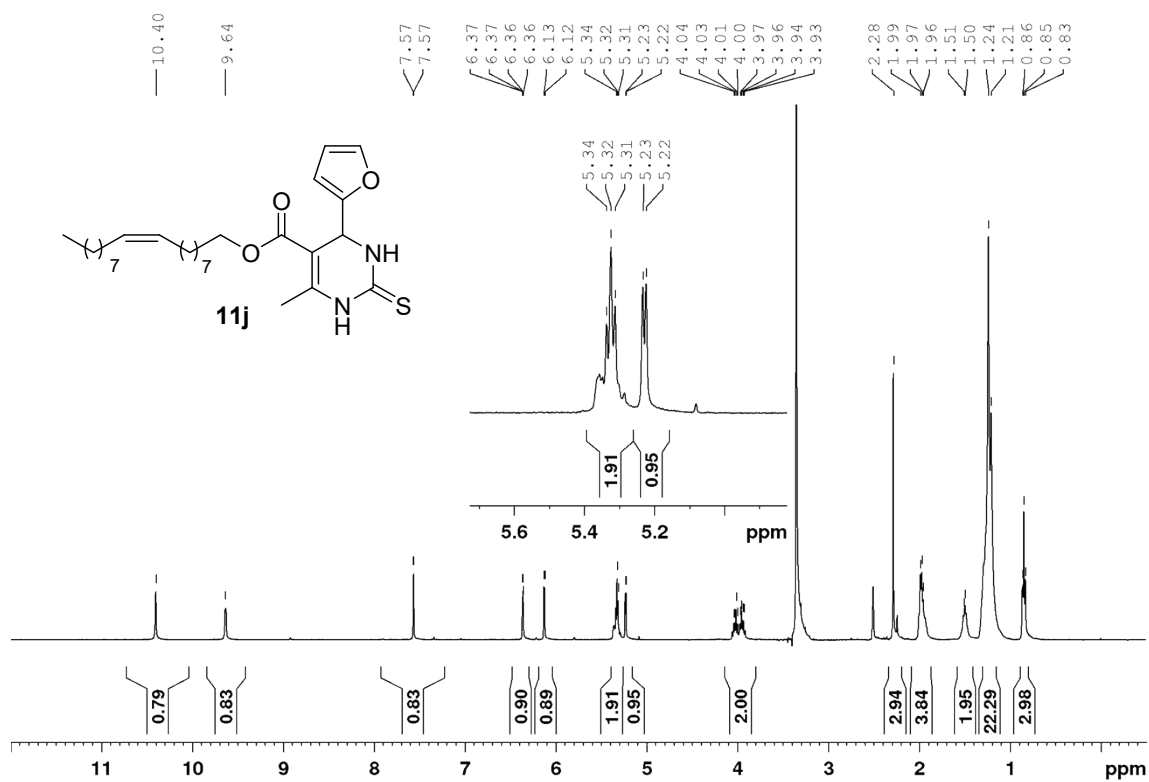

Figure S58.  $^1\text{H}$  NMR (400 MHz,  $\text{DMSO-d}_6$ ) spectrum of **11j**

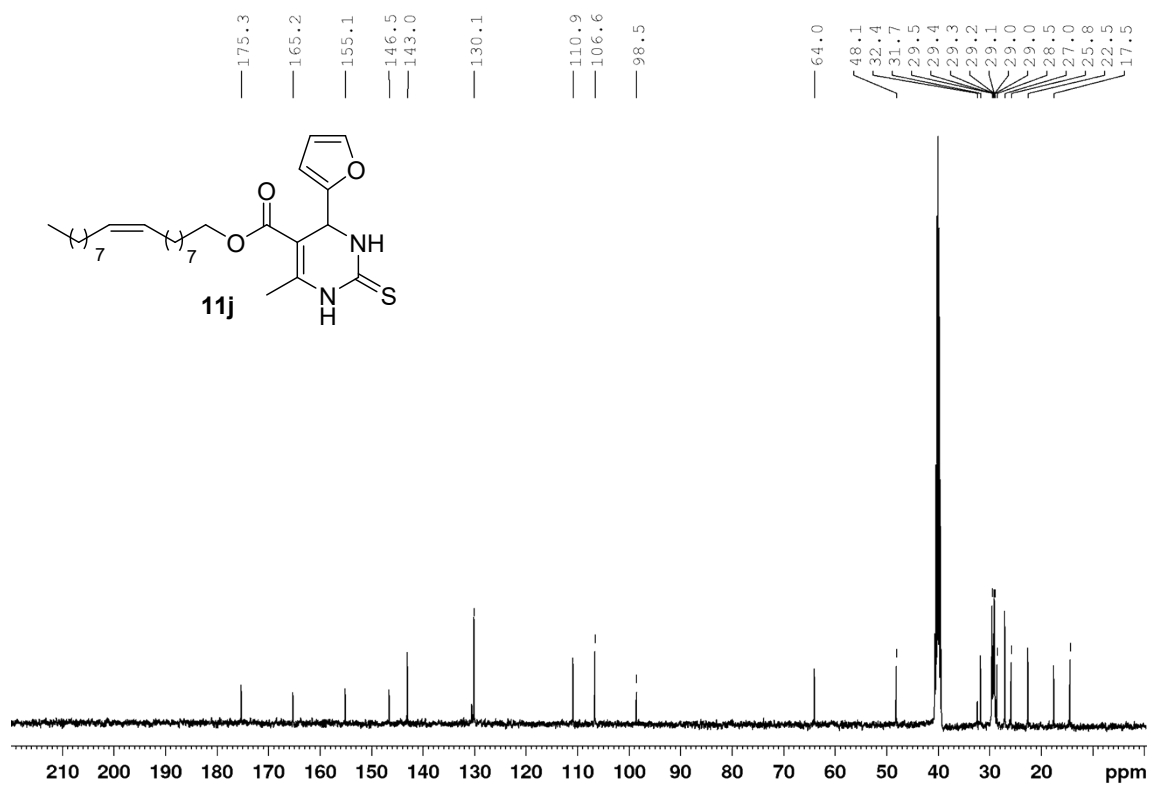

**Figure S59.**  $^{13}\text{C}$  NMR (100 MHz,  $\text{DMSO-d}_6$ ) spectrum of **11j**

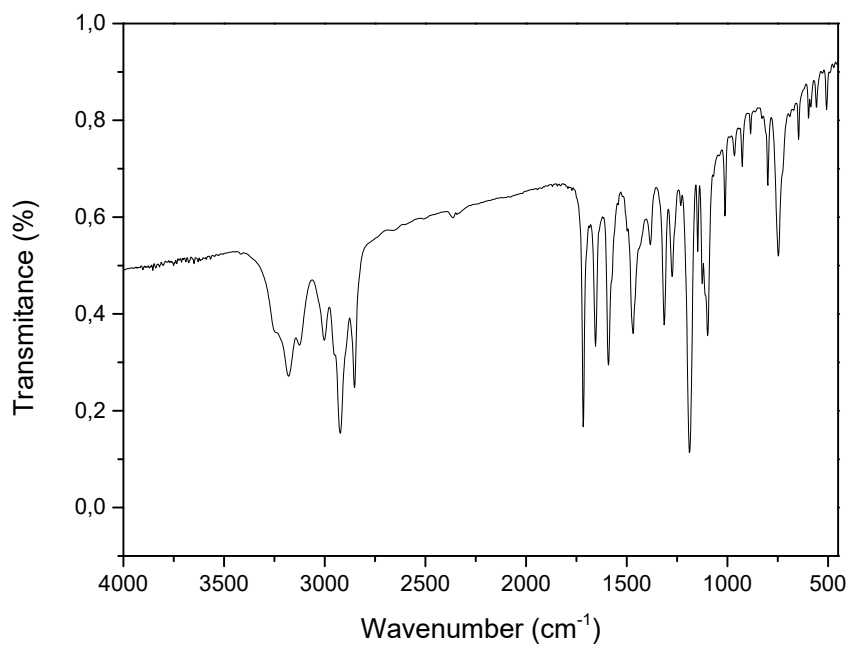

**Figure S60.** FT-IR (4000-400  $\text{cm}^{-1}$ , KBr) spectrum of **11j**
